# Supplementary material for: Ugi Reaction on α-Phosphorated Ketimines for the Synthesis of Tetrasubstituted α-Aminophosphonates and Their Applications as Antiproliferative Agents
Source: MDPI journal article supplement (doi:10.3390/molecules26061654), 2021-03-16

# Ugi reaction on $\alpha$ -phosphorated ketimines for the synthesis of tetrasubstituted $\alpha$ -aminophosphonates and their applications as antiproliferative agents.

Adrián López-Francés,<sup>1</sup> Xabier del Corte,<sup>1</sup> Edorta Martínez de Marigorta,<sup>1</sup> Francisco Palacios<sup>1,\*</sup> and Javier Vicario<sup>1,\*</sup>

<sup>1</sup> Departamento de Química Orgánica I, Centro de Investigación y Estudios Avanzados “Lucio Lascaray” - Facultad de Farmacia, University of the Basque Country, UPV/EHU Paseo de la Universidad 7, 01006 Vitoria-Gasteiz, SPAIN

\* Correspondence: [francisco.palacios@ehu.eus](mailto:francisco.palacios@ehu.eus) (F. P.) / [javier.vicario@ehu.eus](mailto:javier.vicario@ehu.eus) (J. V.)

Dimethyl (2-(cyclohexylamino)-1-((4-methylphenyl)sulfonamido)-2-oxo-1-phenylethyl)phosphonate (**13a**).

$^1\text{H}$  NMR (400 MHz,  $\text{CDCl}_3$ )

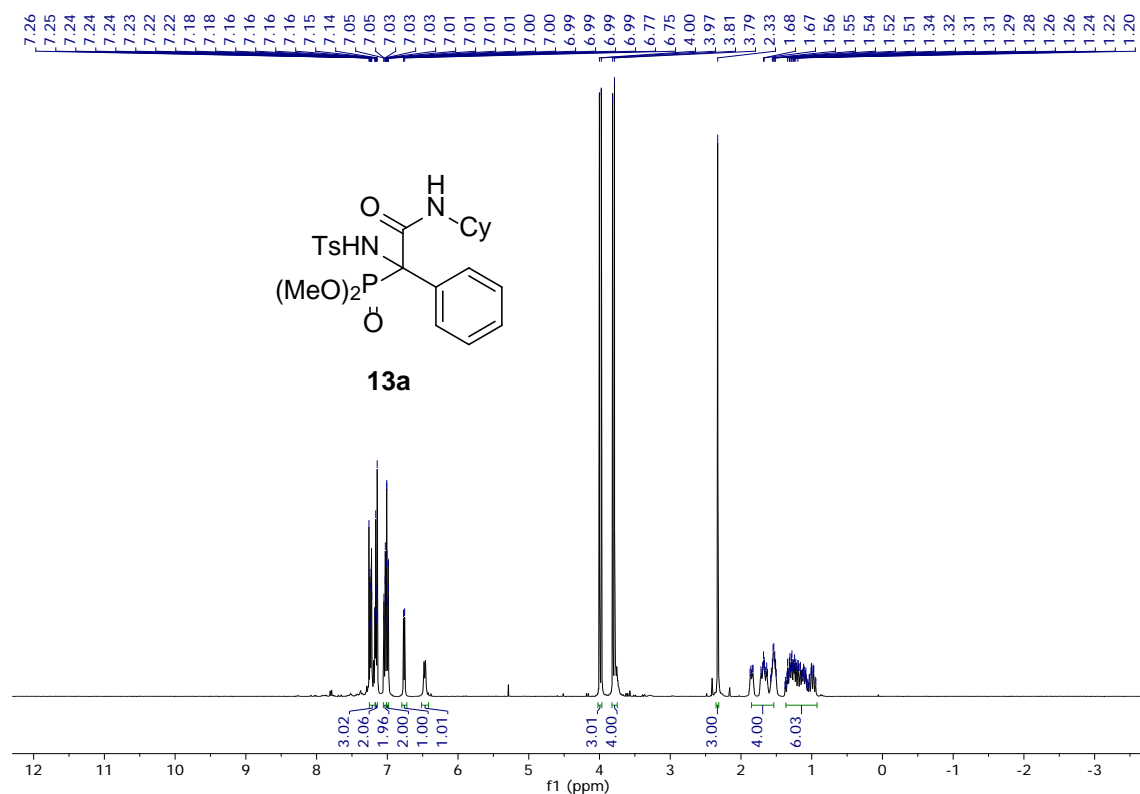

$^{13}\text{C}$  NMR { $^1\text{H}$ } (101 MHz,  $\text{CDCl}_3$ )

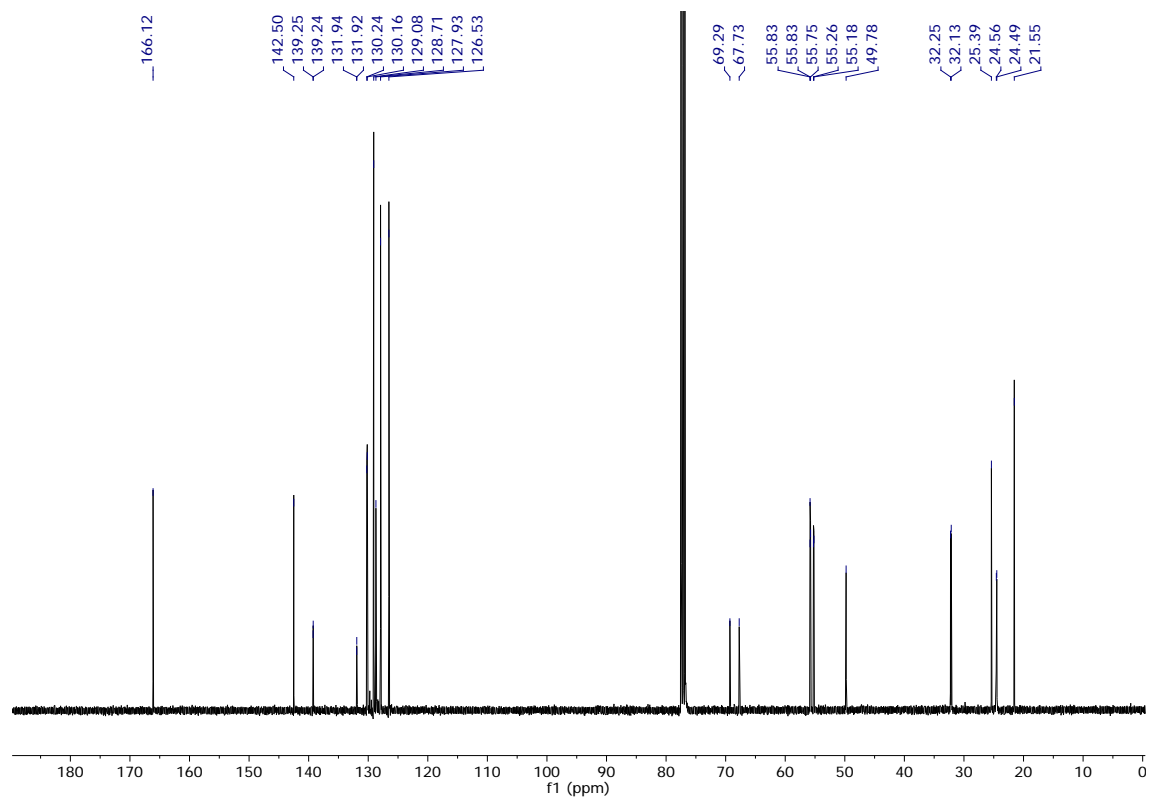

$^{31}\text{P}$  NMR (121 MHz,  $\text{CDCl}_3$ )

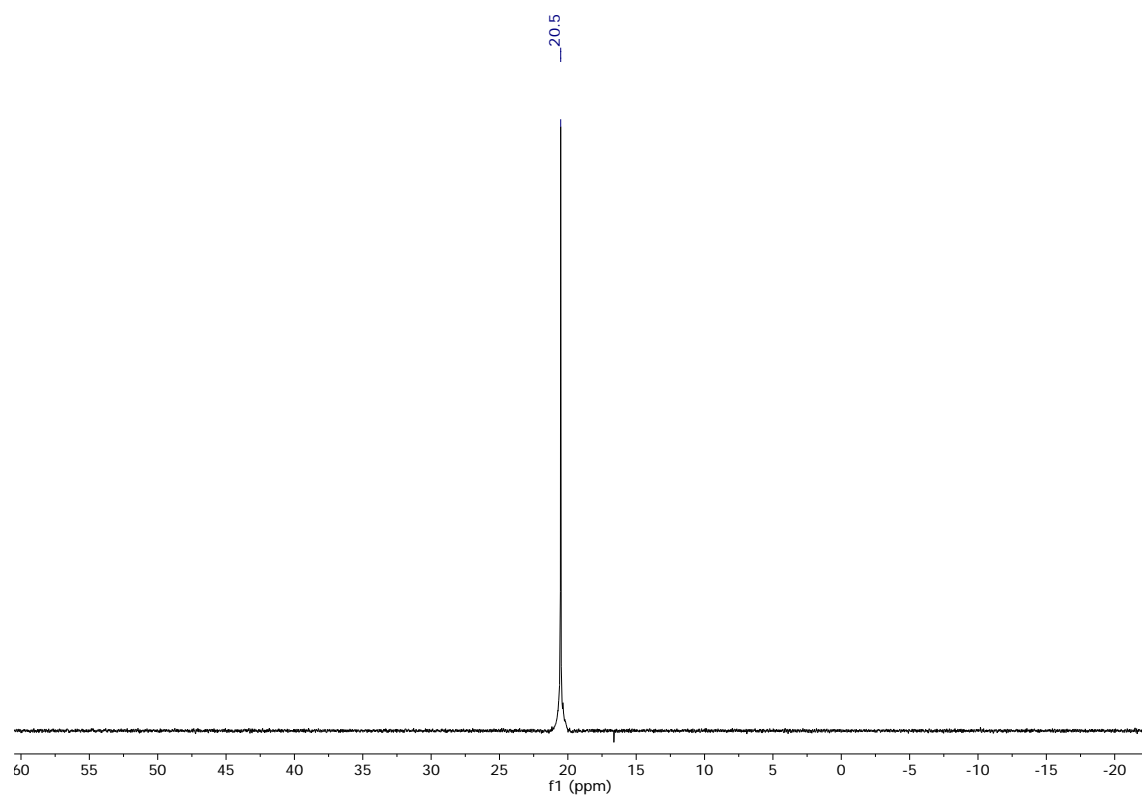

Methyl (2-(dimethoxyphosphoryl)-2-((4-methylphenyl)sulfonamido)-2-phenylacetyl)glycinate (**13b**)

$^1\text{H}$  NMR (400 MHz,  $\text{CDCl}_3$ )

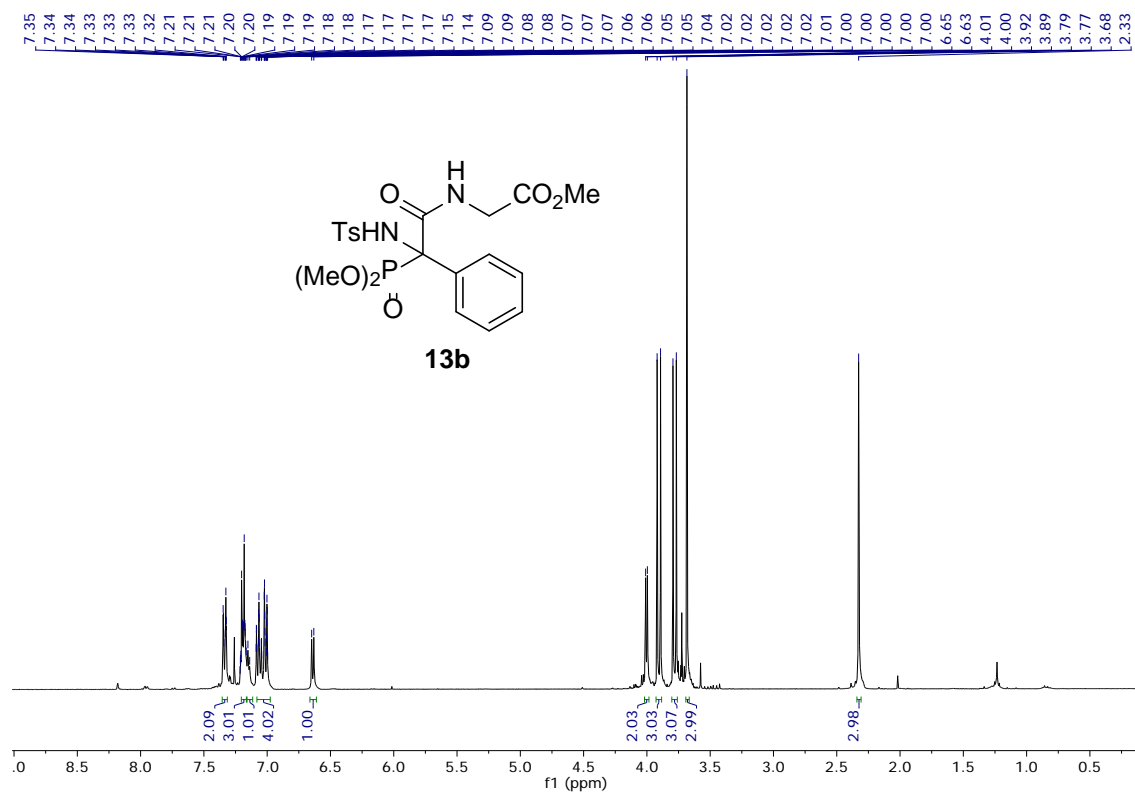

$^{13}\text{C}$  NMR [ $^1\text{H}$ ] (101 MHz,  $\text{CDCl}_3$ )

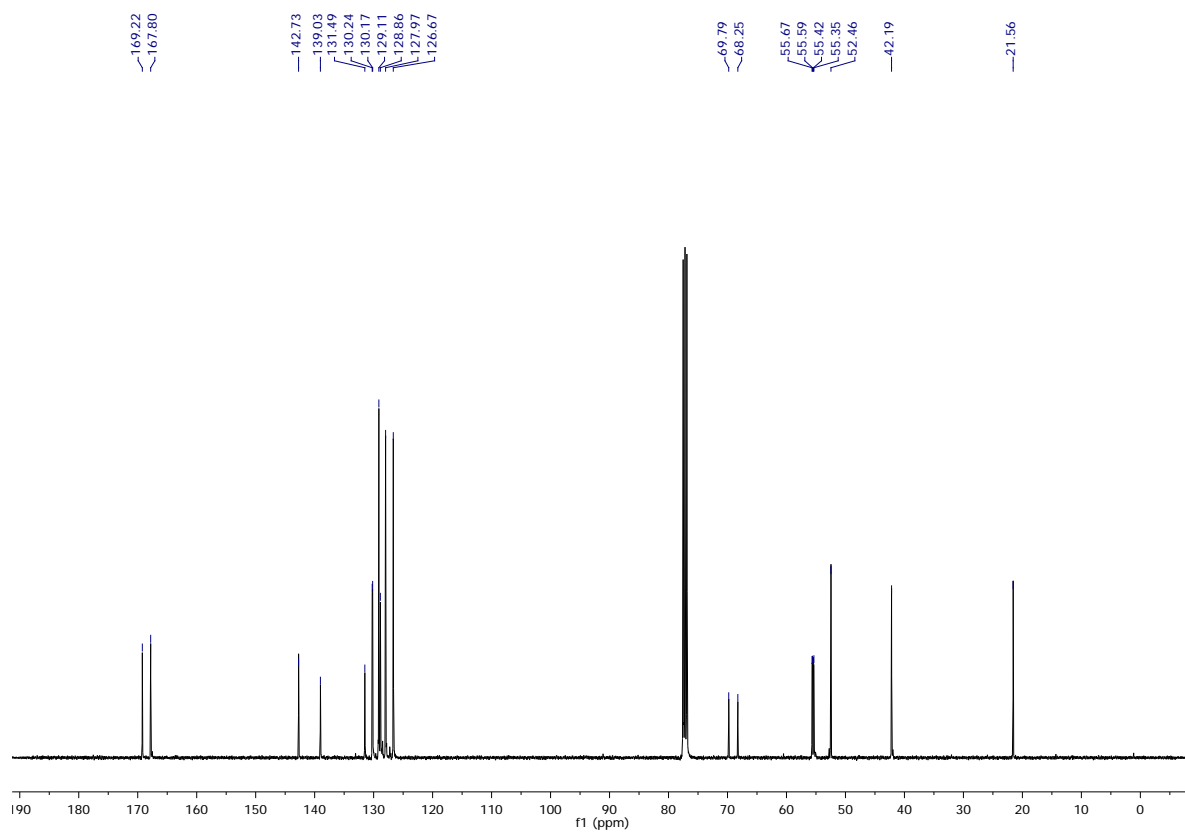

$^{31}\text{P}$  NMR (121 MHz,  $\text{CDCl}_3$ )

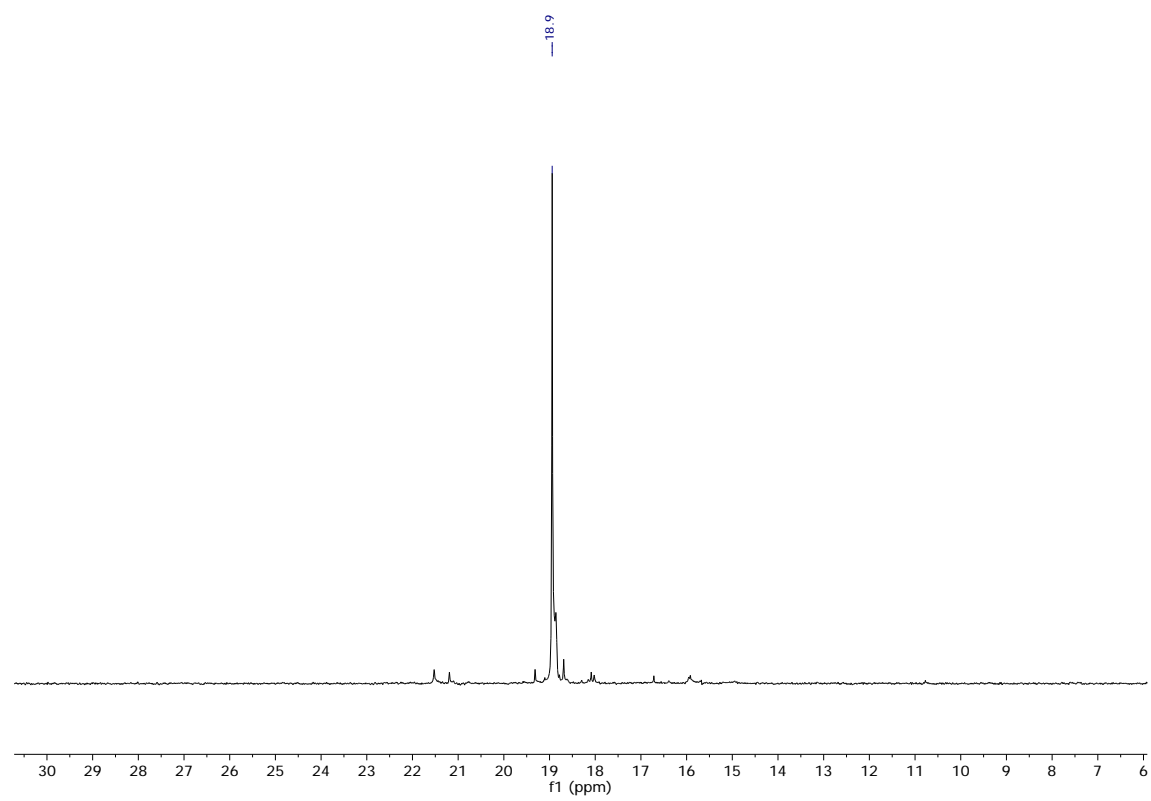

Dimethyl (2-(benzylamino)-1-((4-methylphenyl)sulfonamido)-2-oxo-1-phenylethyl)phosphonate (**13c**)

$^1\text{H}$  NMR (400 MHz,  $\text{CDCl}_3$ )

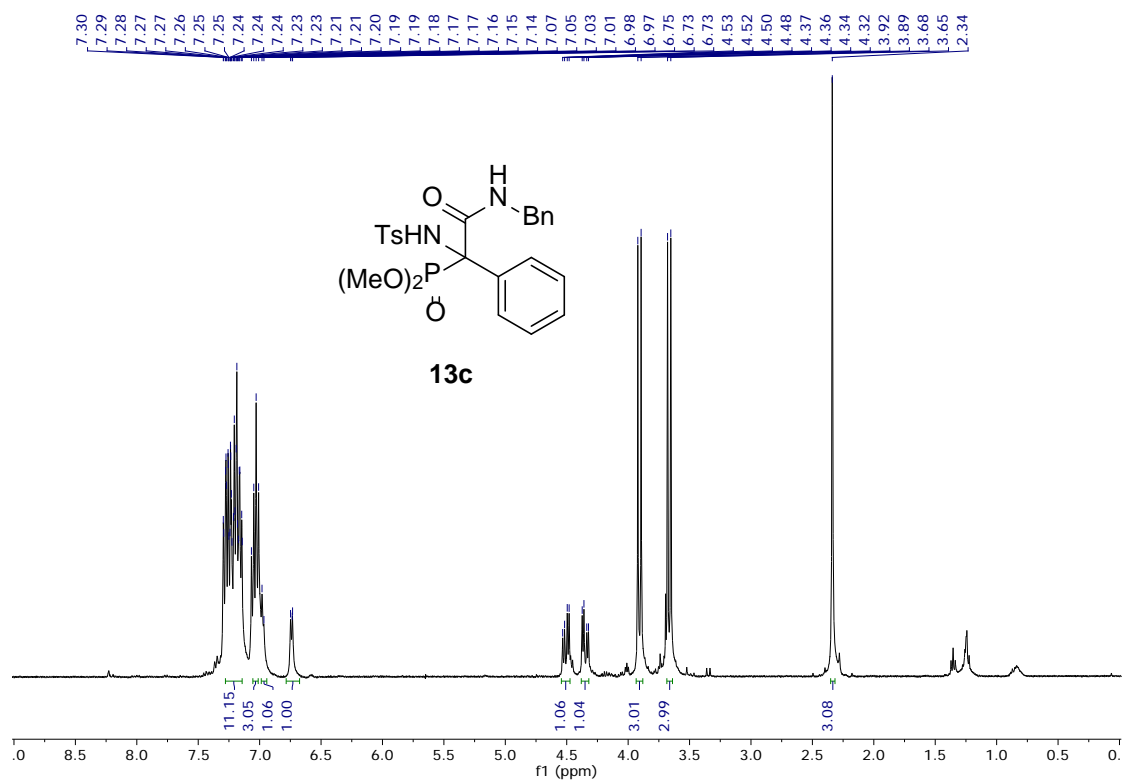

$^{13}\text{C}$  NMR  $\{^1\text{H}\}$  (101 MHz,  $\text{CDCl}_3$ )

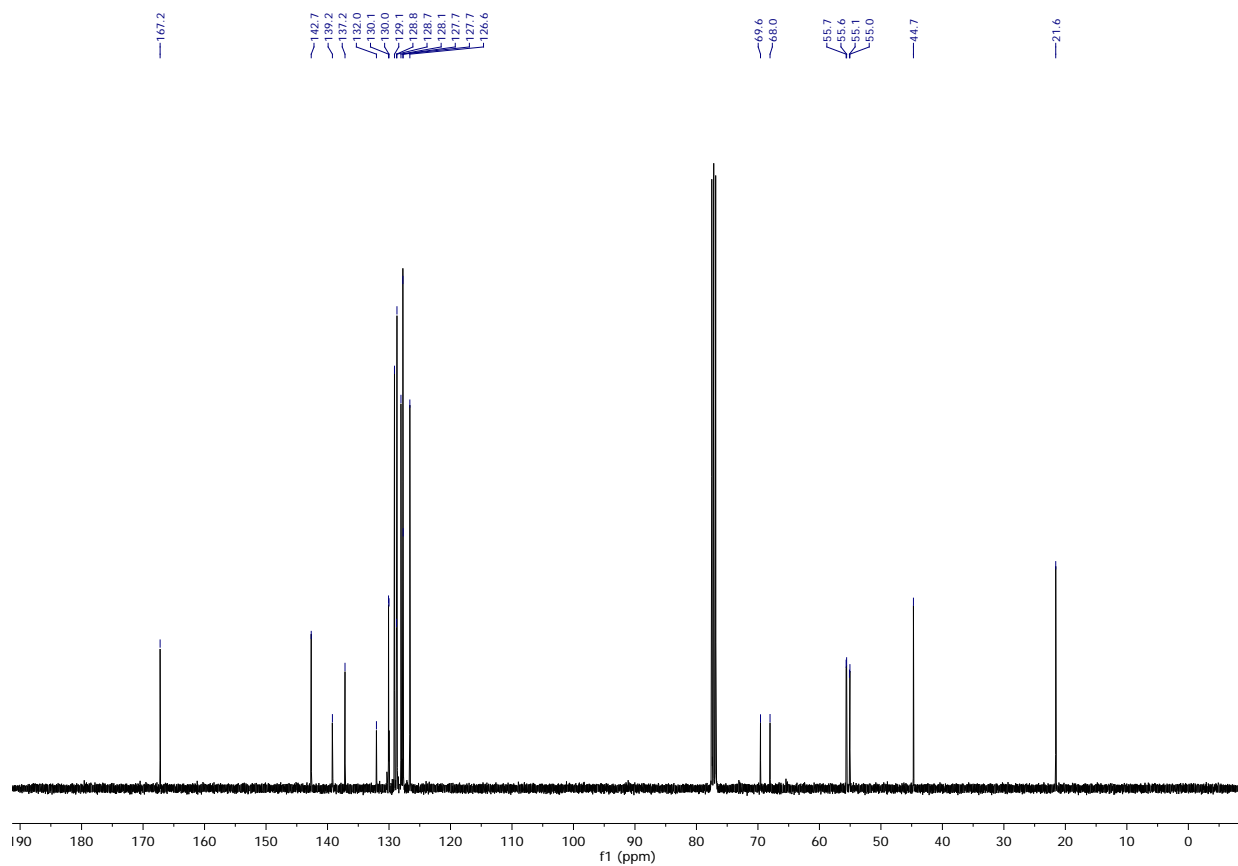

$^{31}\text{P}$  NMR (121 MHz,  $\text{CDCl}_3$ )

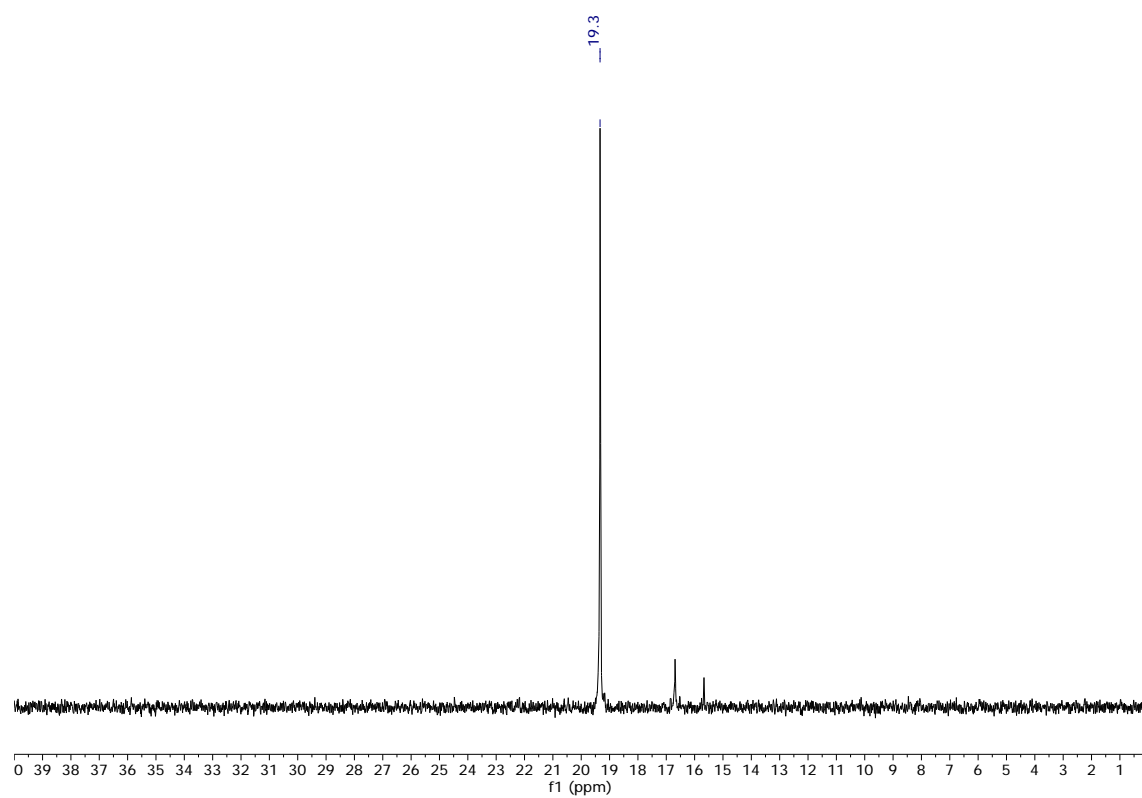

Diethyl (2-(cyclohexylamino)-1-((4-methylphenyl)sulfonamido)-2-oxo-1-phenylethyl)phosphonate (**13d**)

$^1\text{H}$  NMR (400 MHz,  $\text{CDCl}_3$ )

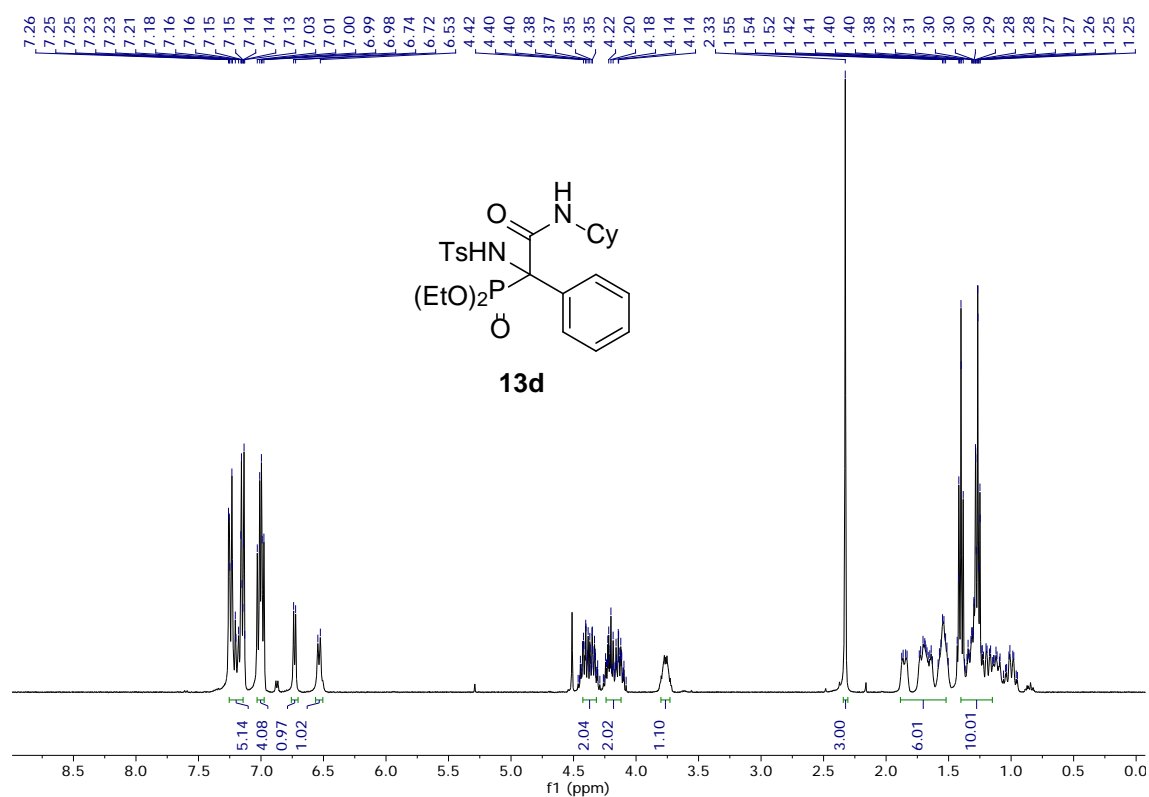

$^{13}\text{C}$  NMR  $\{^1\text{H}\}$  (101 MHz,  $\text{CDCl}_3$ )

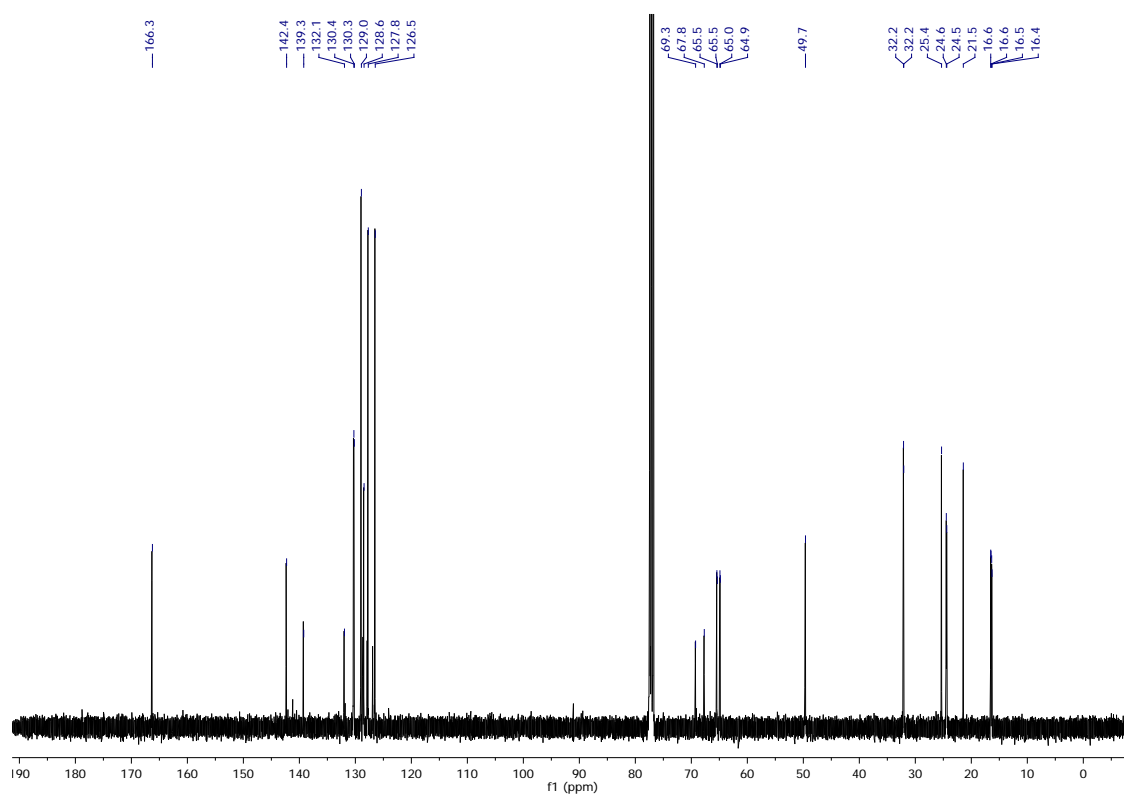



$^{31}\text{P}$  NMR (121 MHz,  $\text{CDCl}_3$ )

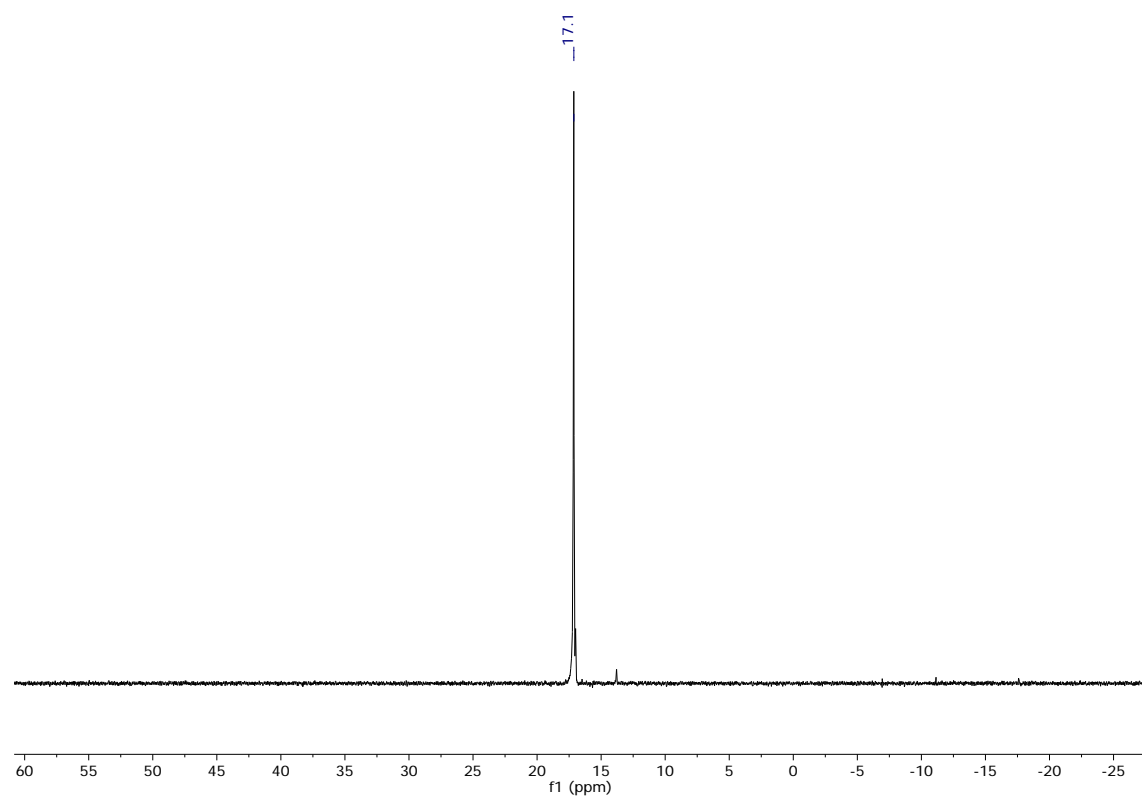

**Methyl (2-(diethoxyphosphoryl)-2-((4-methylphenyl)sulfonamido)-2-phenylacetyl)glycinate  
(13e)**

$^1\text{H}$  NMR (400 MHz,  $\text{CDCl}_3$ )

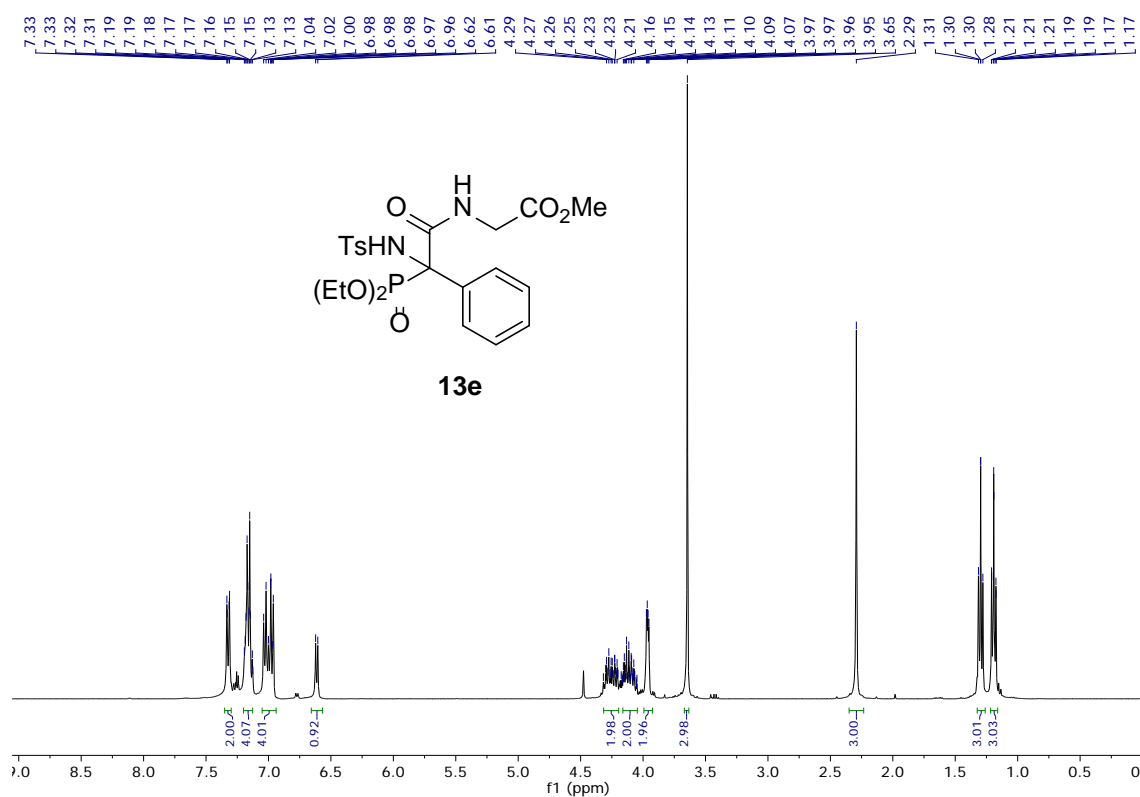

$^{13}\text{C}$  NMR  $\{^1\text{H}\}$  (101 MHz,  $\text{CDCl}_3$ )

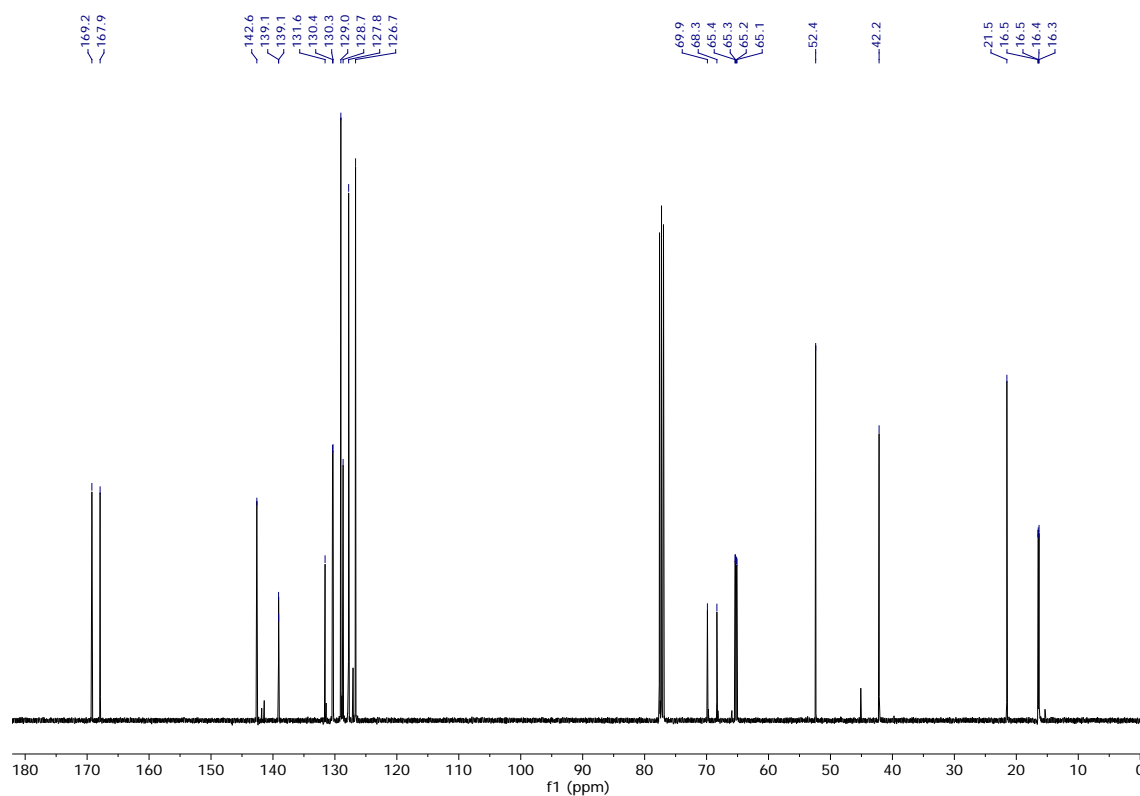

$^{31}\text{P}$ -NMR (121 MHz,  $\text{CDCl}_3$ )

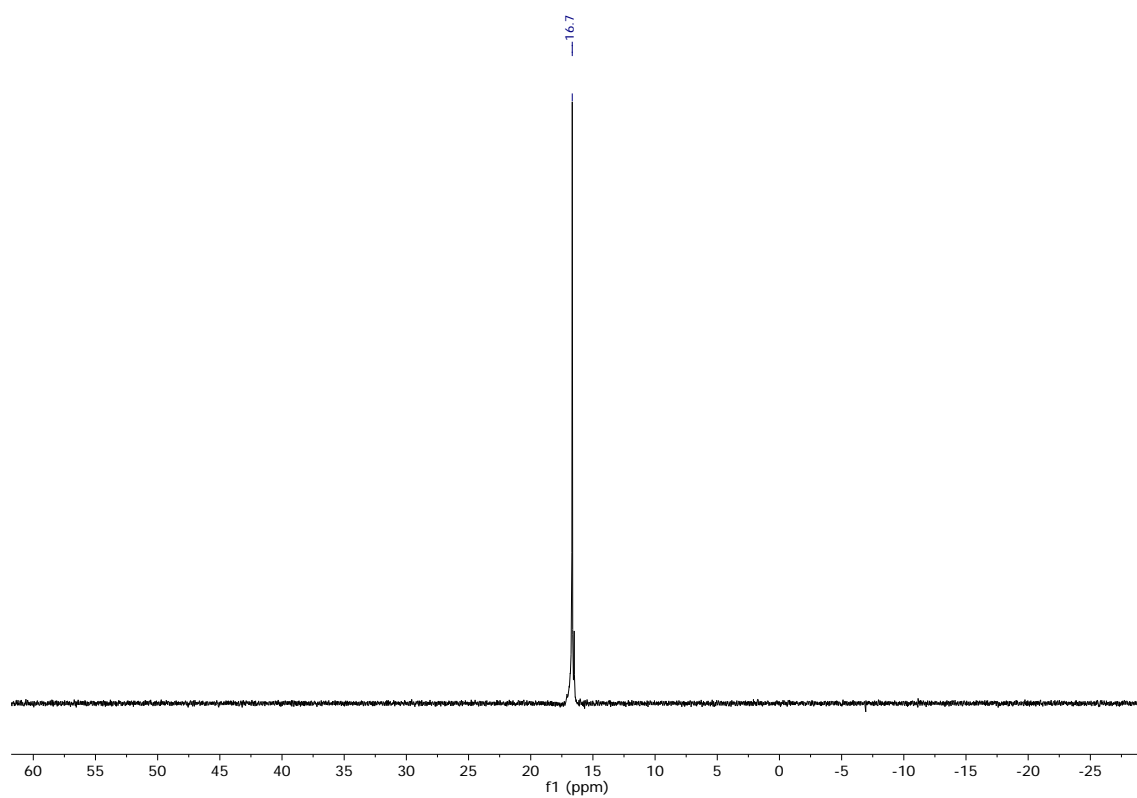

Diethyl (2-(benzylamino)-1-((4-methylphenyl)sulfonamido)-2-oxo-1-phenylethyl)phosphonate (13f)

$^1\text{H}$  NMR (400 MHz,  $\text{CDCl}_3$ )

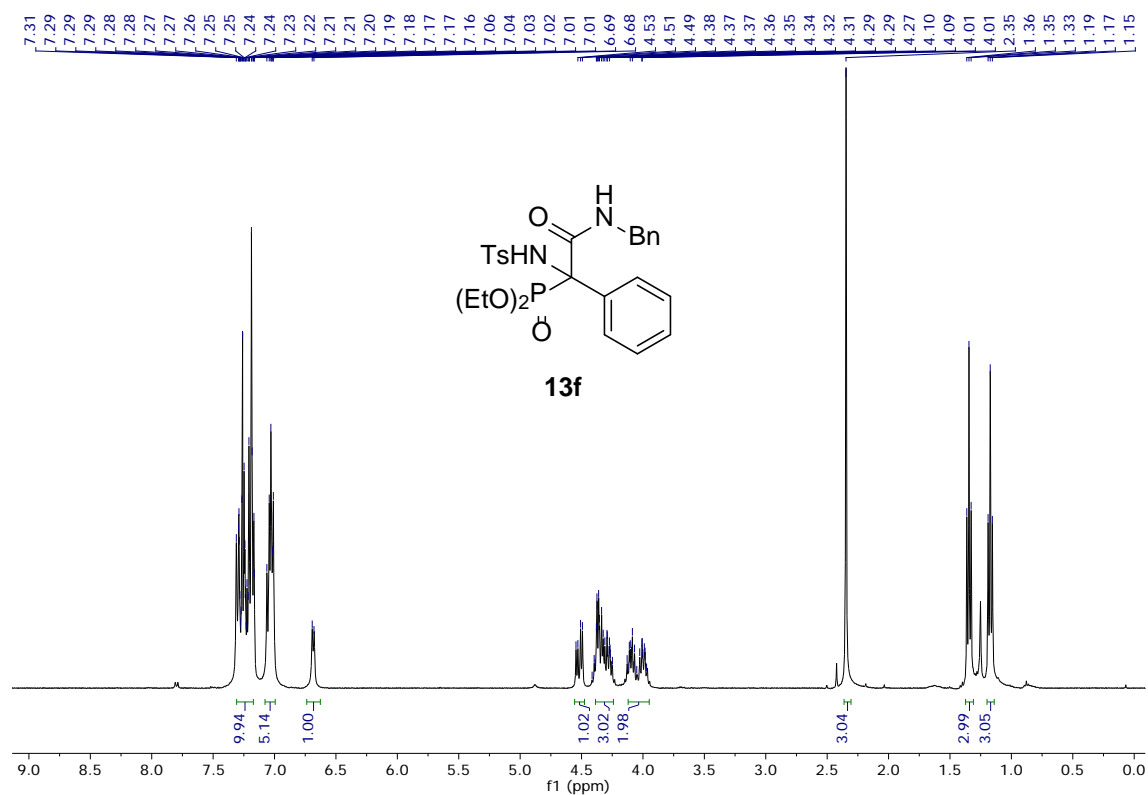

$^{13}\text{C}$  NMR  $\{^1\text{H}\}$  (101 MHz,  $\text{CDCl}_3$ )

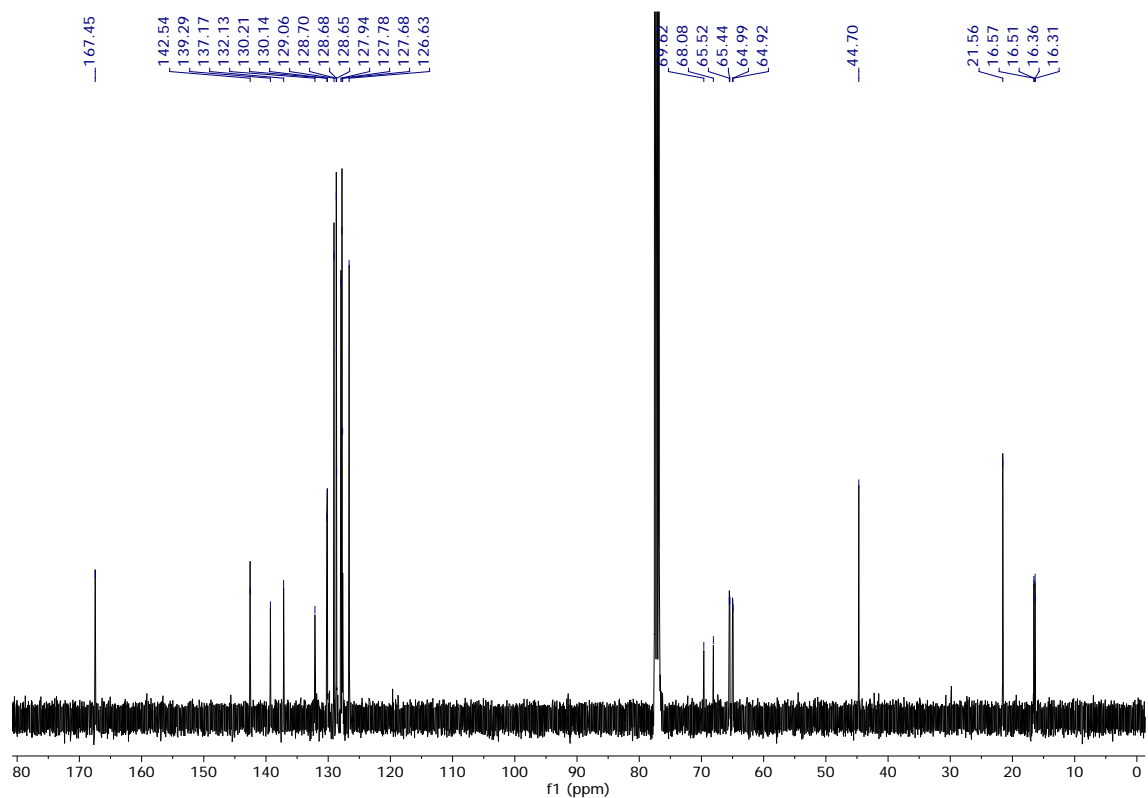

$^{31}\text{P}$ -NMR (121 MHz,  $\text{CDCl}_3$ )

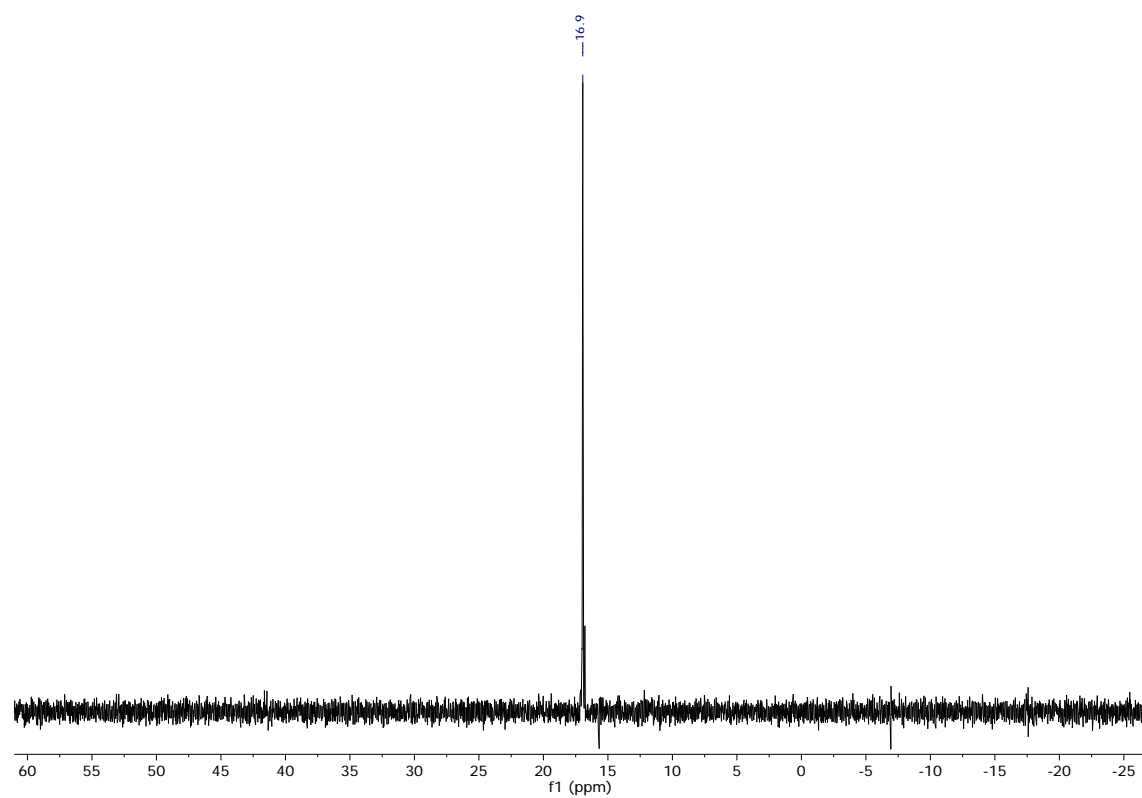

Dibenzyl (2-(cyclohexylamino)-1-((4-methylphenyl)sulfonamido)-2-oxo-1-phenylethyl)phosphonate (13g)

$^1\text{H}$  NMR (400 MHz,  $\text{CDCl}_3$ )

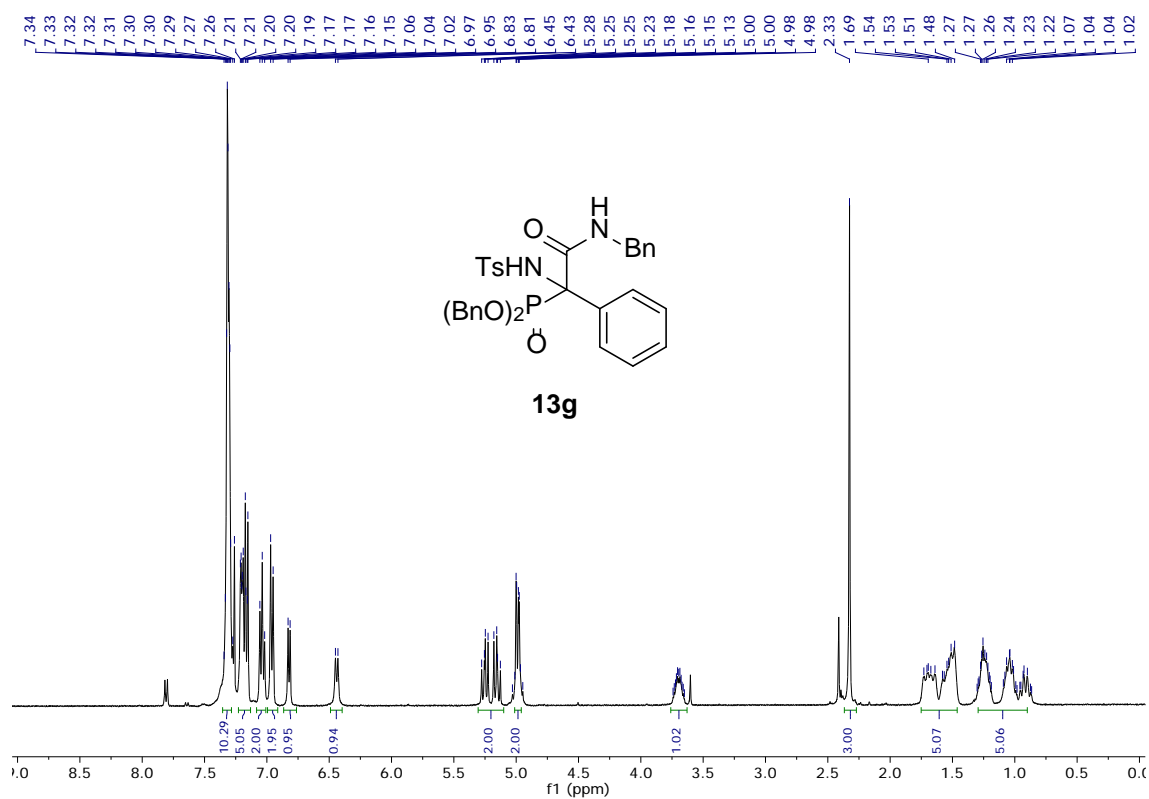

$^{13}\text{C}$  NMR { $^1\text{H}$ } (101 MHz,  $\text{CDCl}_3$ )

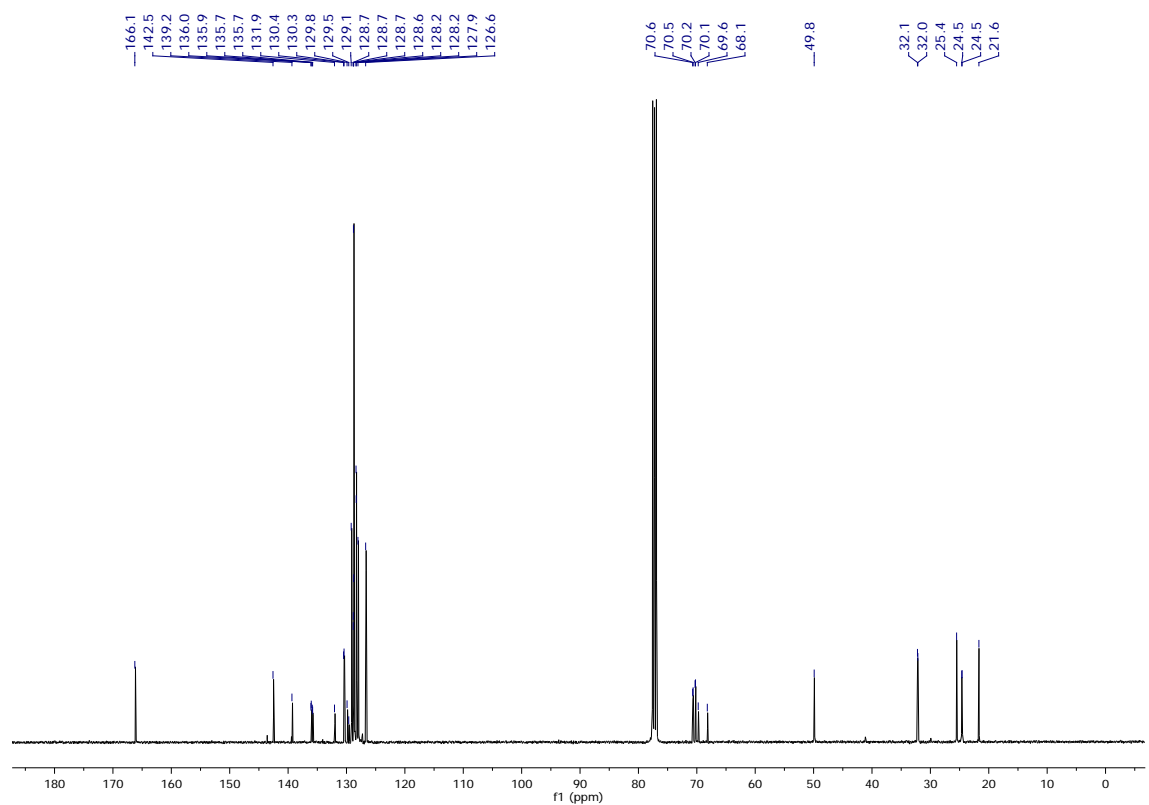

**$^{31}\text{P}$ -NMR (121 MHz,  $\text{CDCl}_3$ )**

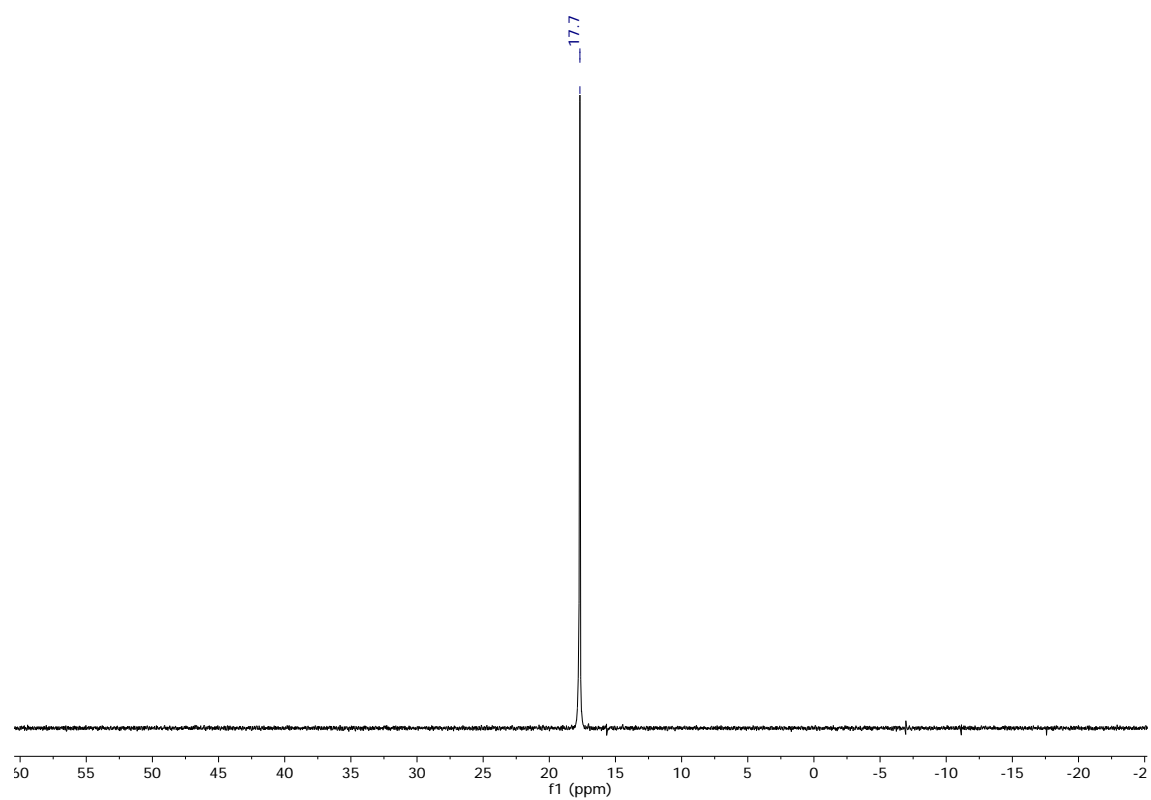

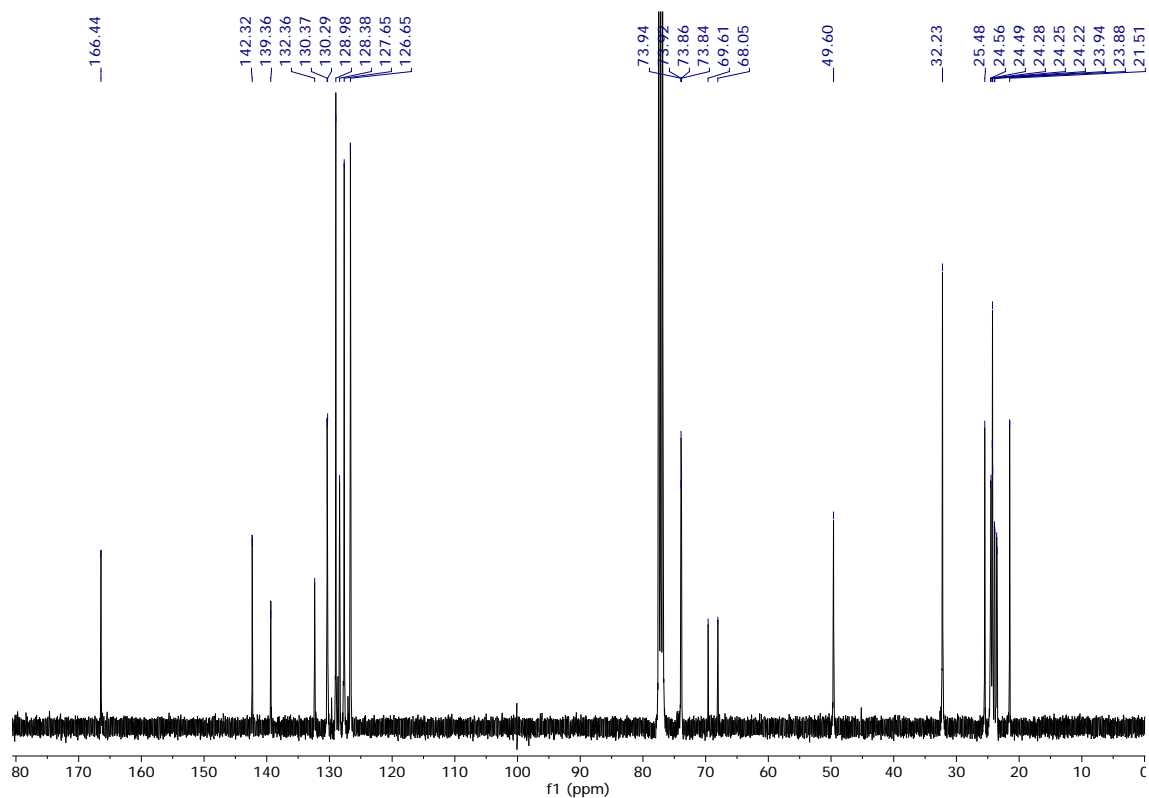



$^{31}\text{P}$  NMR (121 MHz,  $\text{CDCl}_3$ )

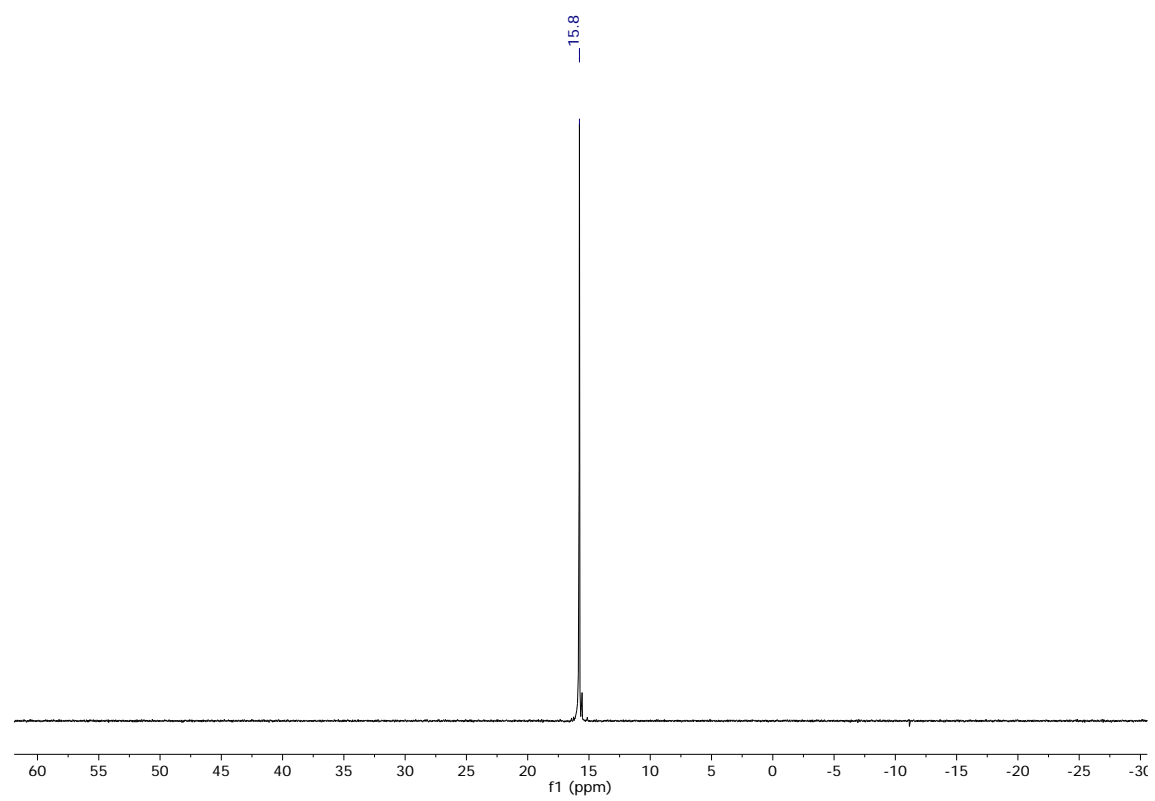

Methyl (2-(diisopropoxyphosphoryl)-2-((4-methylphenyl)sulfonamido)-2-phenylacetyl)glycinate (**13i**)

$^1\text{H}$  NMR (400 MHz,  $\text{CDCl}_3$ )

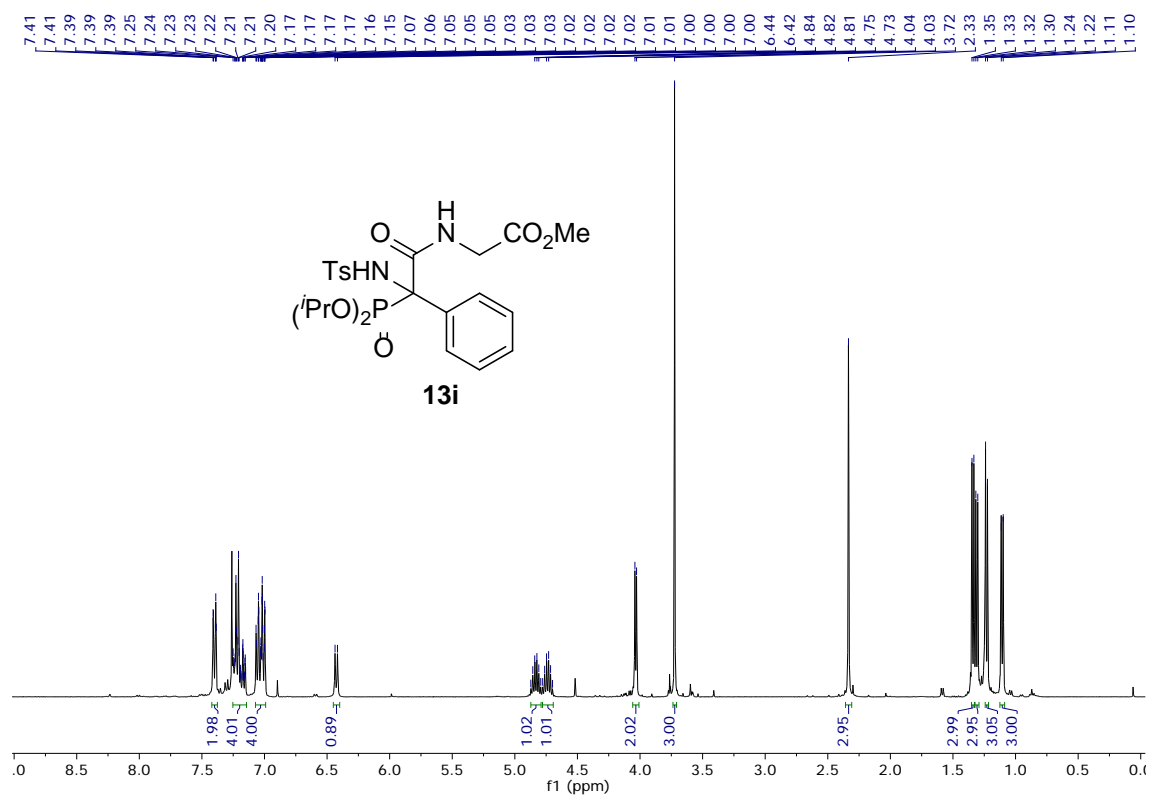

$^{13}\text{C}$  NMR  $\{^1\text{H}\}$  (101 MHz,  $\text{CDCl}_3$ )

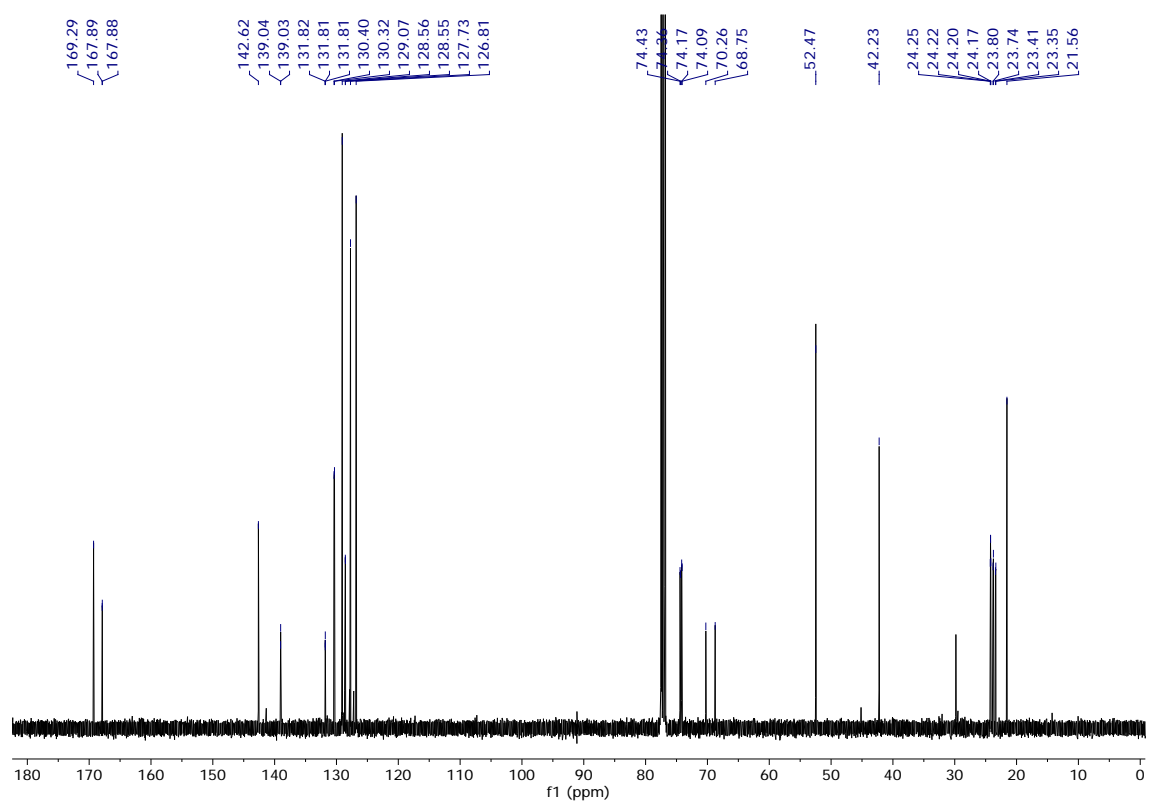

$^{31}\text{P}$  NMR (121 MHz,  $\text{CDCl}_3$ )

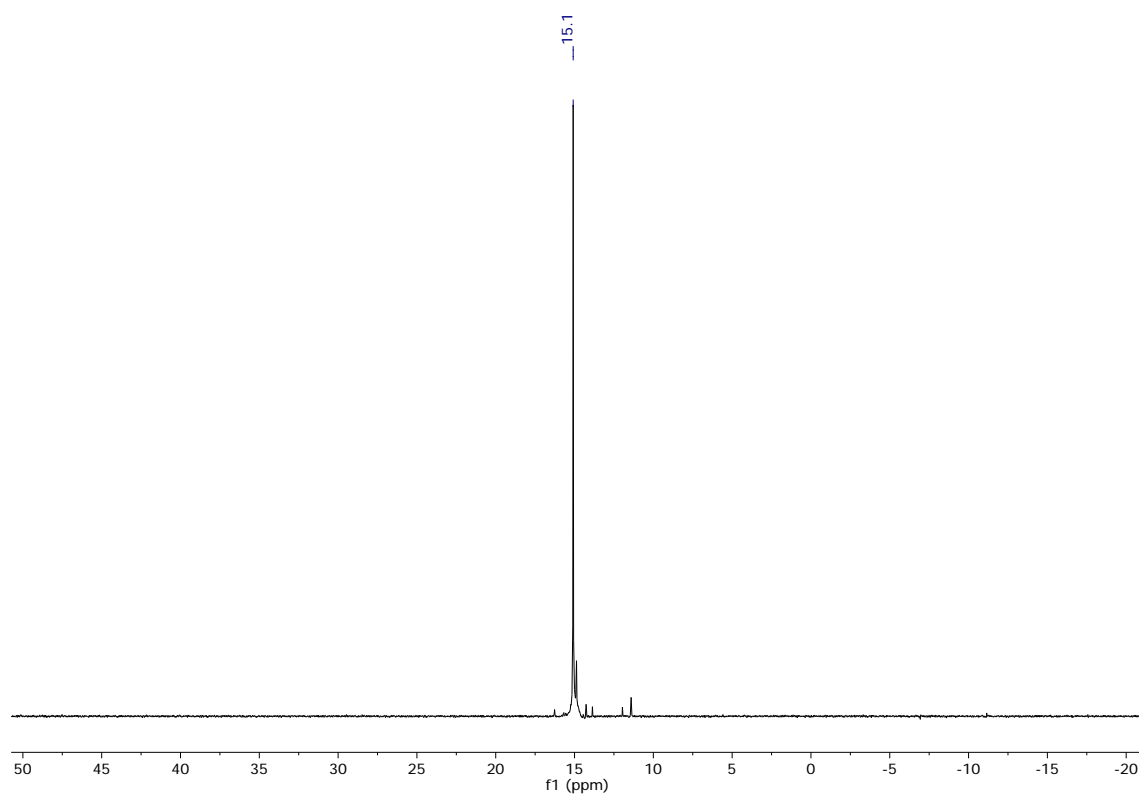

Diisopropyl (2-(benzylamino)-1-((4-methylphenyl)sulfonamido)-2-oxo-1-phenylethyl)phosphonate (**13j**)

$^1\text{H}$  NMR (400 MHz,  $\text{CDCl}_3$ )

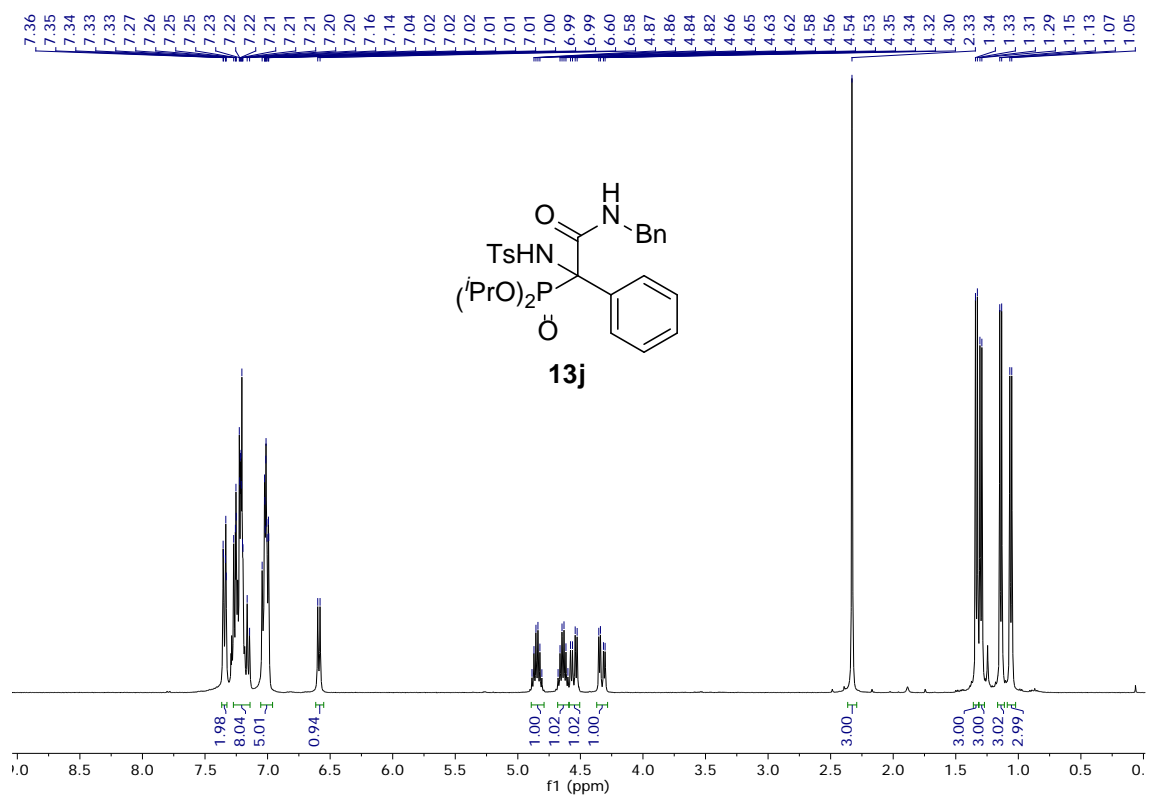

$^{13}\text{C}$  NMR  $\{^1\text{H}\}$  (101 MHz,  $\text{CDCl}_3$ )

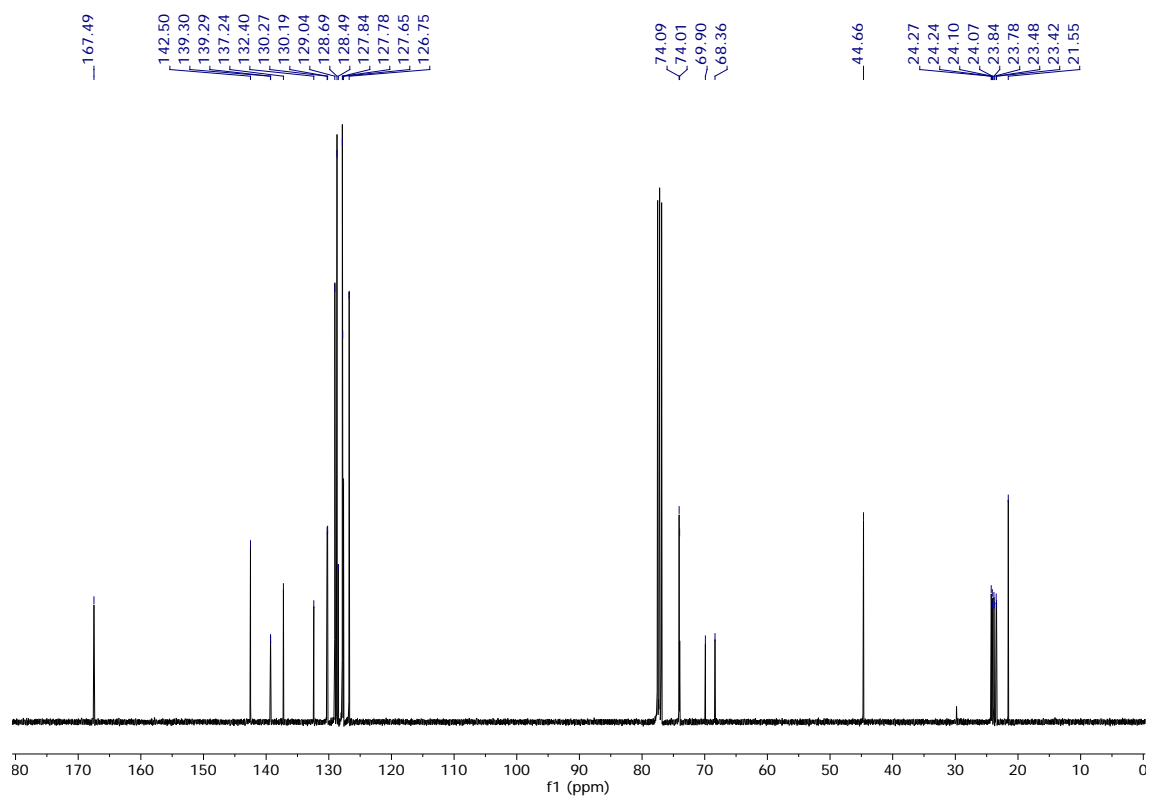

$^{31}\text{P}$  NMR (121 MHz,  $\text{CDCl}_3$ )

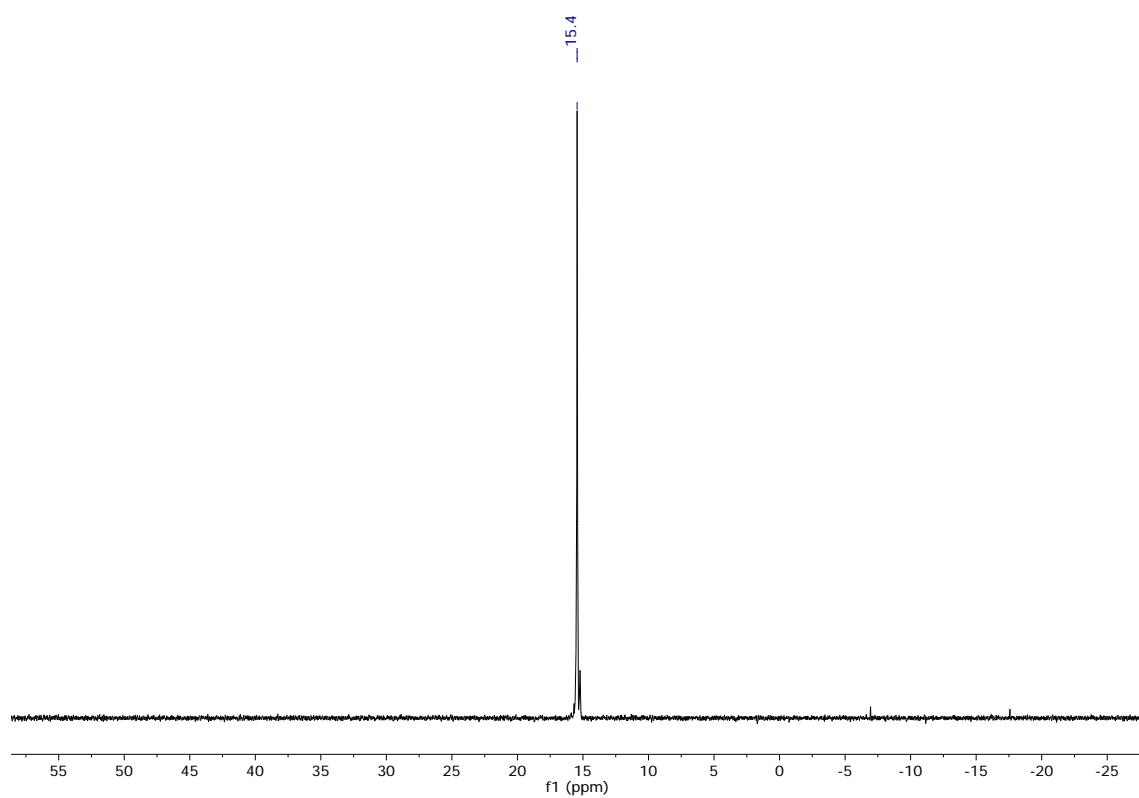

Dimethyl (2-(cyclohexylamino)-1-((4-methylphenyl)sulfonamido)-1-(4-nitrophenyl)-2-oxoethyl)phosphonate (13k)

$^1\text{H}$  NMR (400 MHz,  $\text{CDCl}_3$ )

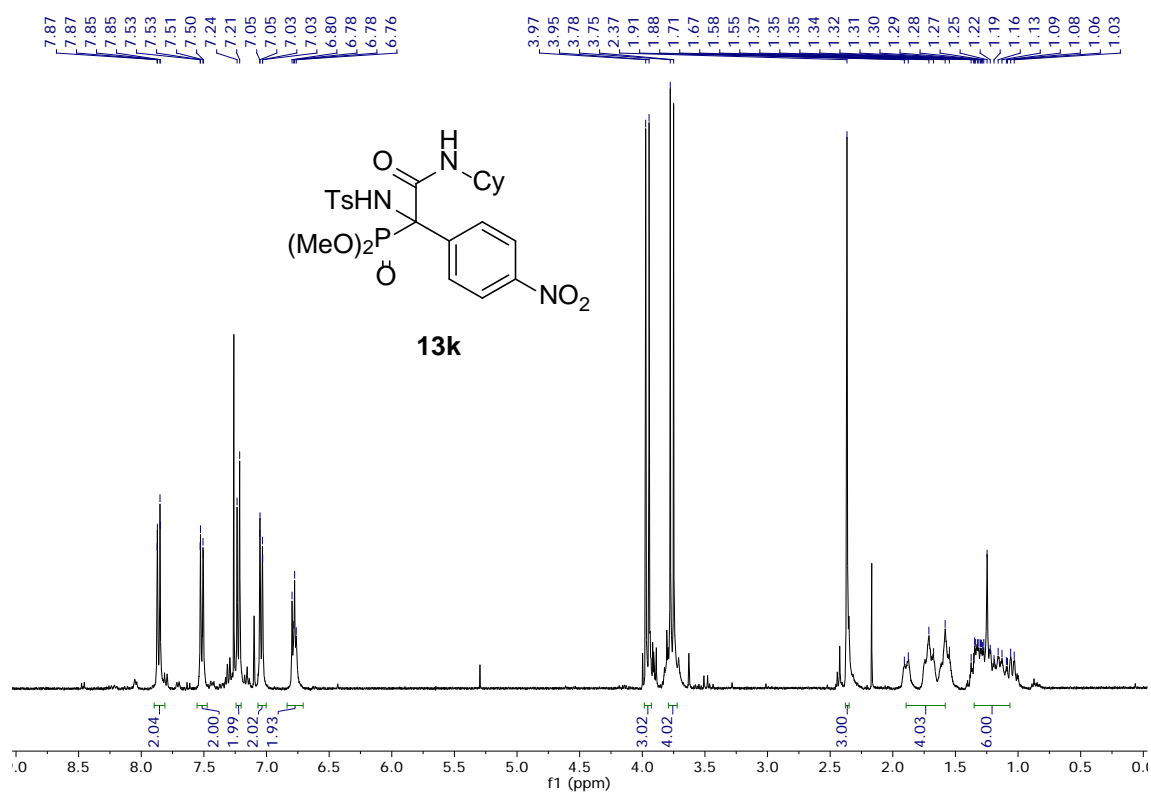

$^{13}\text{C}$  NMR { $^1\text{H}$ } (101 MHz,  $\text{CDCl}_3$ )

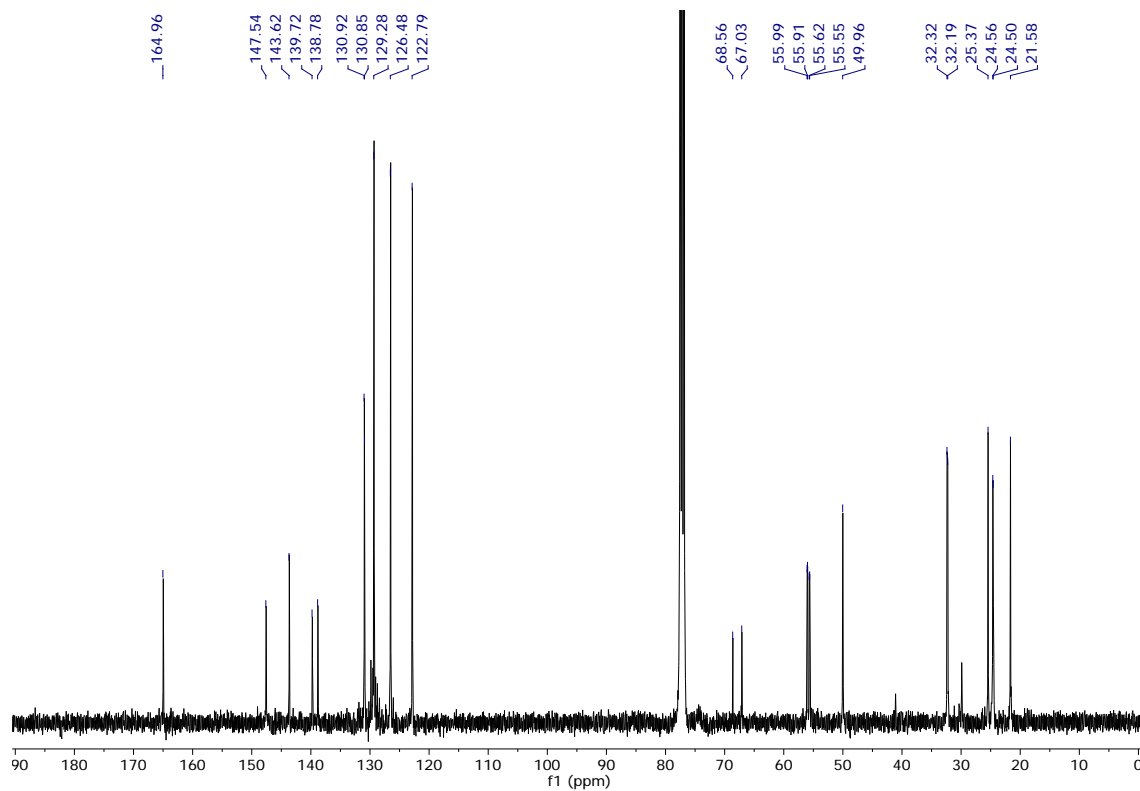

$^{31}\text{P}$  NMR (121 MHz,  $\text{CDCl}_3$ )

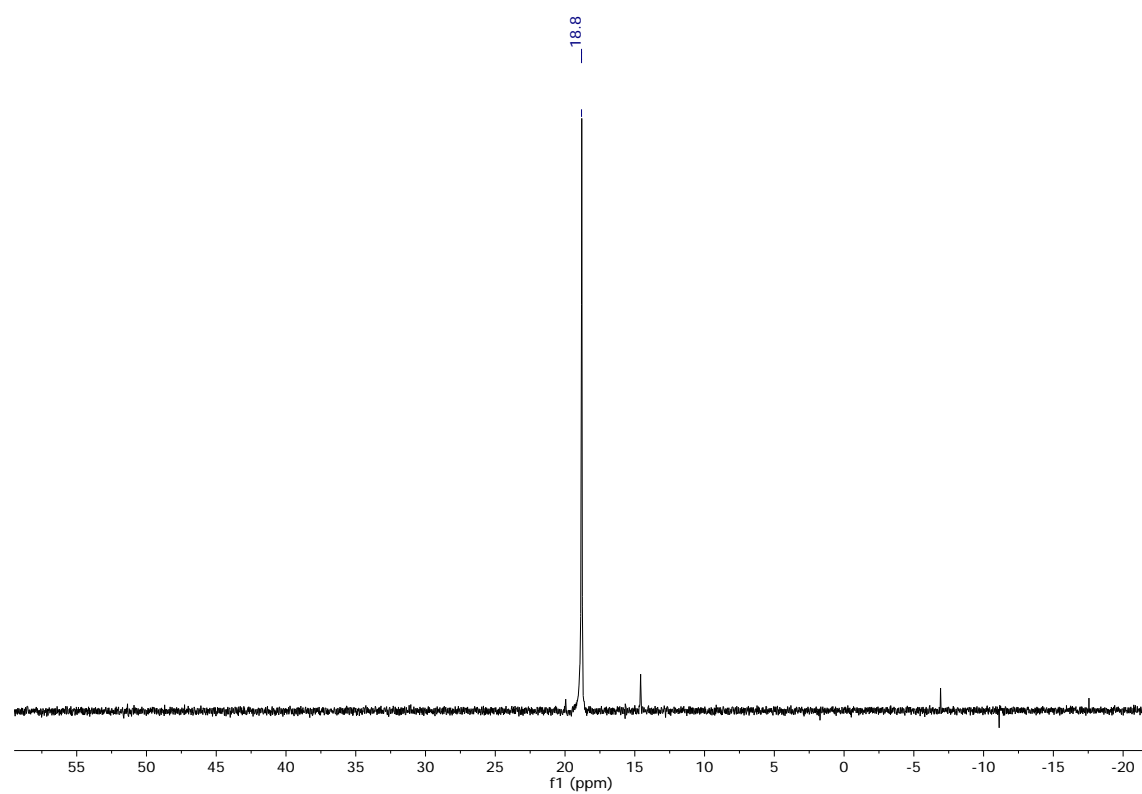

Dimethyl (1-(4-bromophenyl)-2-(cyclohexylamino)-1-((4-methylphenyl)sulfonamido)-2-oxoethyl)phosphonate (**13I**)

$^1\text{H}$  NMR (400 MHz,  $\text{CDCl}_3$ )

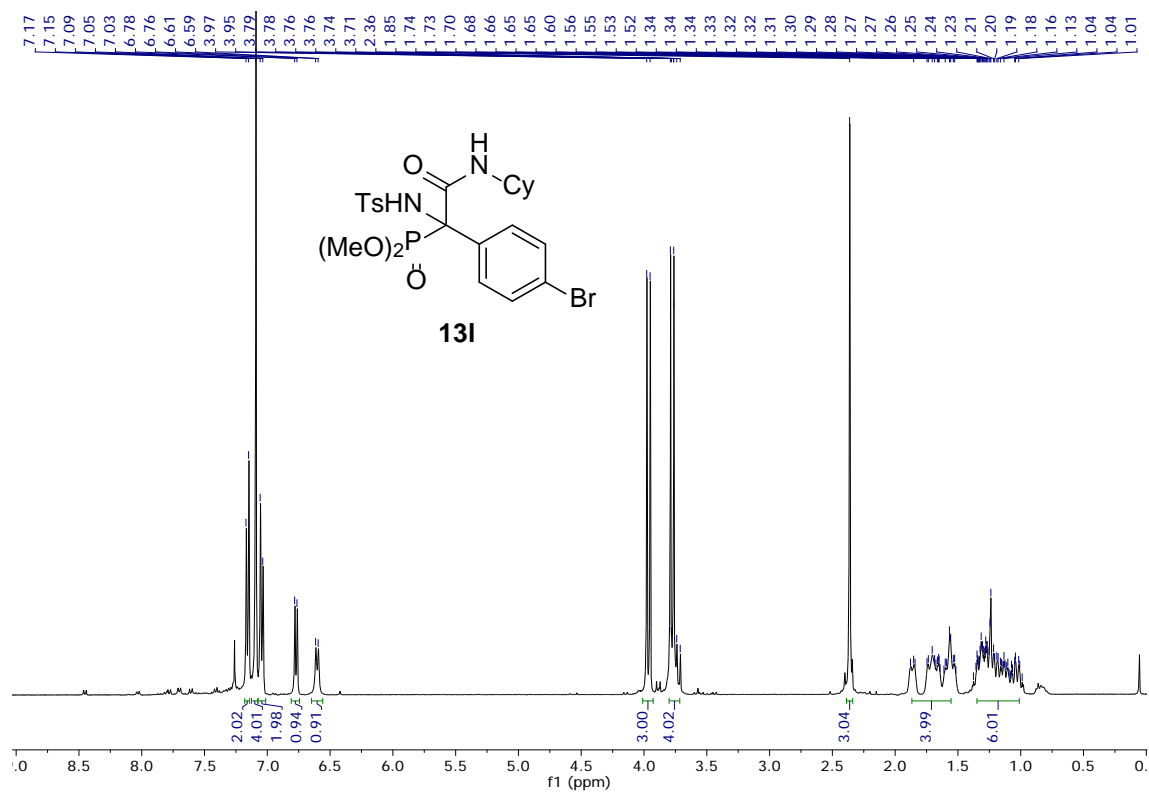

$^{13}\text{C}$  NMR { $^1\text{H}$ } (101 MHz,  $\text{CDCl}_3$ )

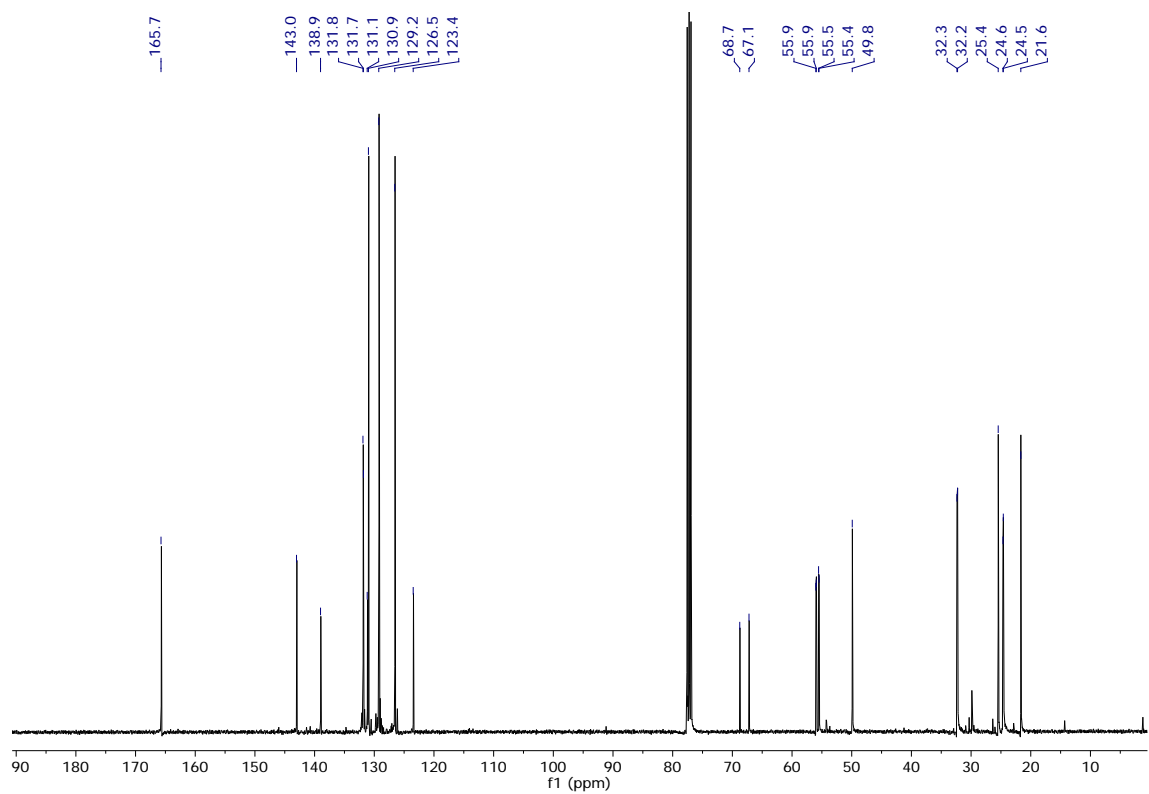



$^{31}\text{P}$  NMR (121 MHz,  $\text{CDCl}_3$ )

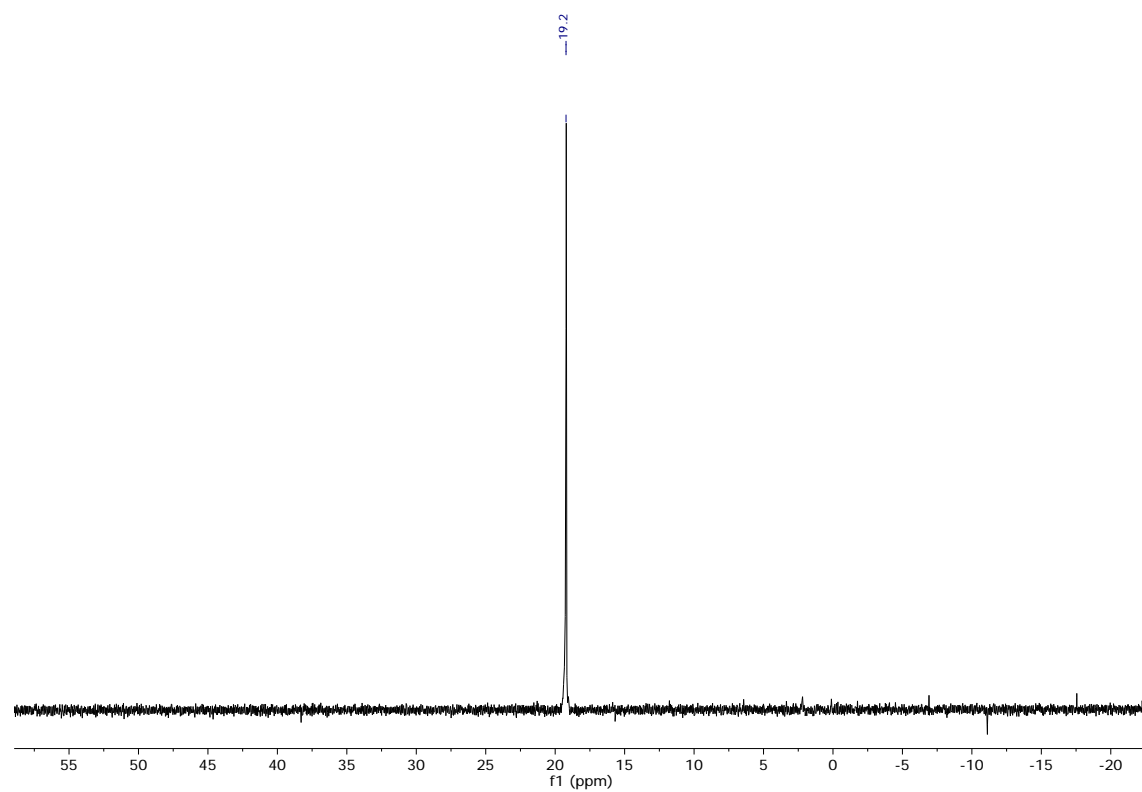

**Dimethyl (1-(4-chlorophenyl)-2-(cyclohexylamino)-1-((4-methylphenyl)sulfonamido)-2-oxoethyl)phosphonate (13m)**

**<sup>1</sup>H NMR (400 MHz, CDCl<sub>3</sub>)**

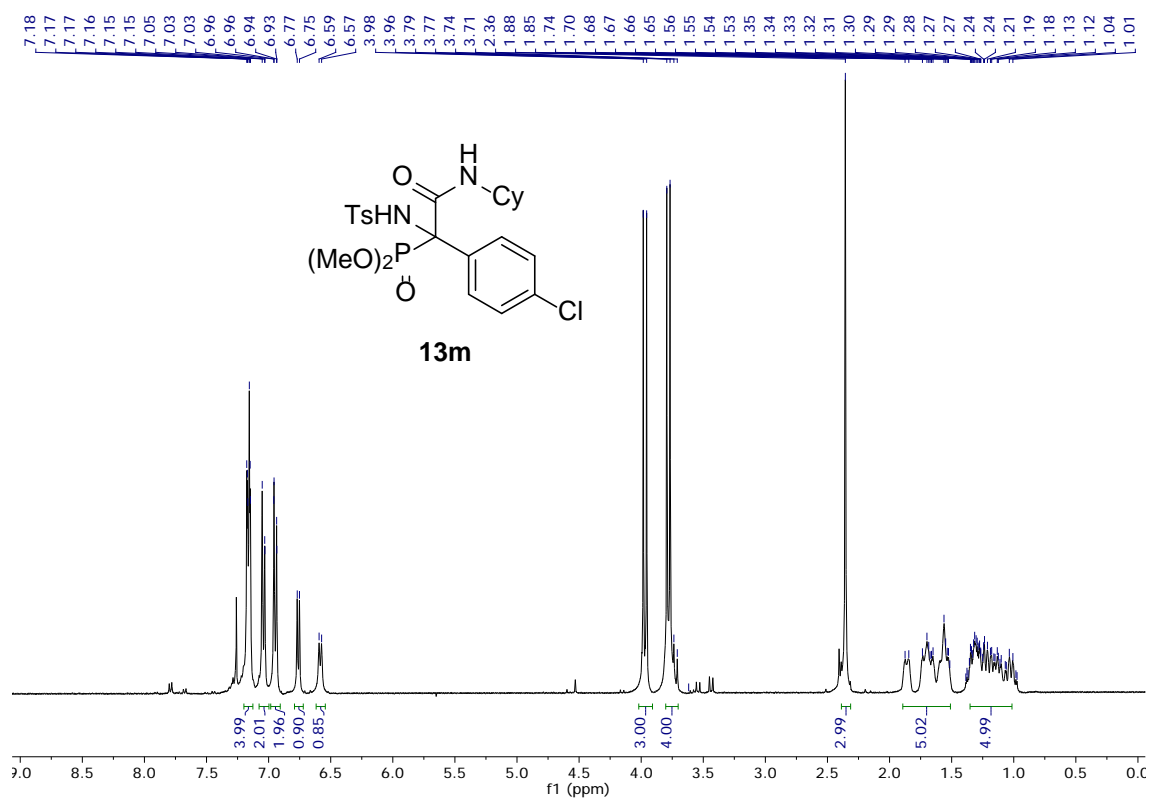

**<sup>13</sup>C NMR {<sup>1</sup>H} (101 MHz, CDCl<sub>3</sub>)**

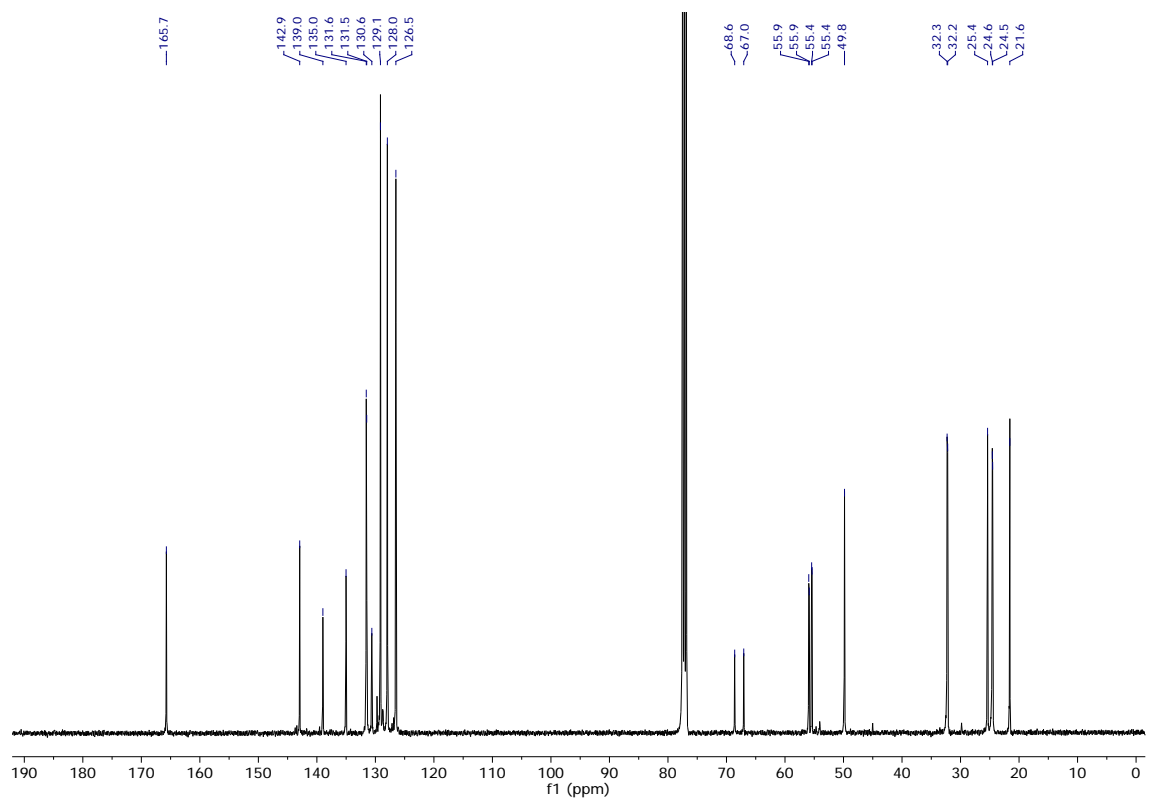

$^{31}\text{P}$  NMR (121 MHz,  $\text{CDCl}_3$ )

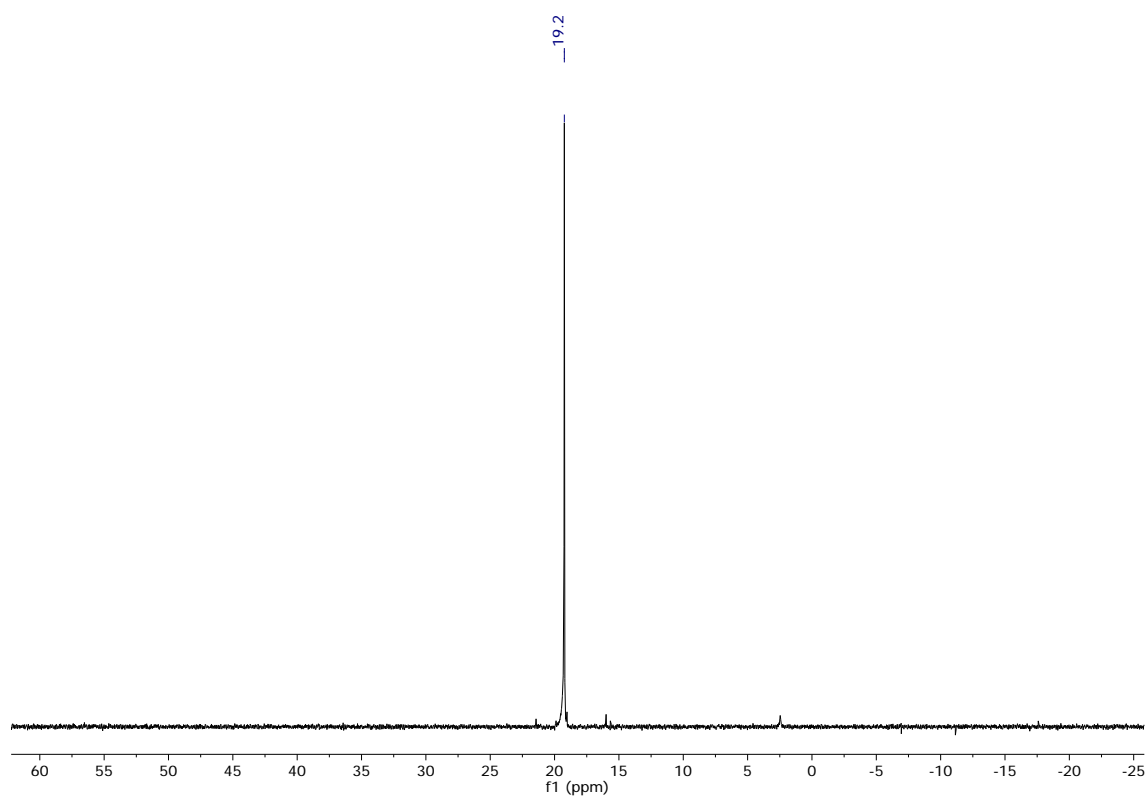

**Dimethyl (2-(cyclohexylamino)-1-(2-fluorophenyl)-1-((4-methylphenyl)sulfonamido)-2-oxoethyl)phosphonate (13n)**

**<sup>1</sup>H NMR (400 MHz, CDCl<sub>3</sub>)**

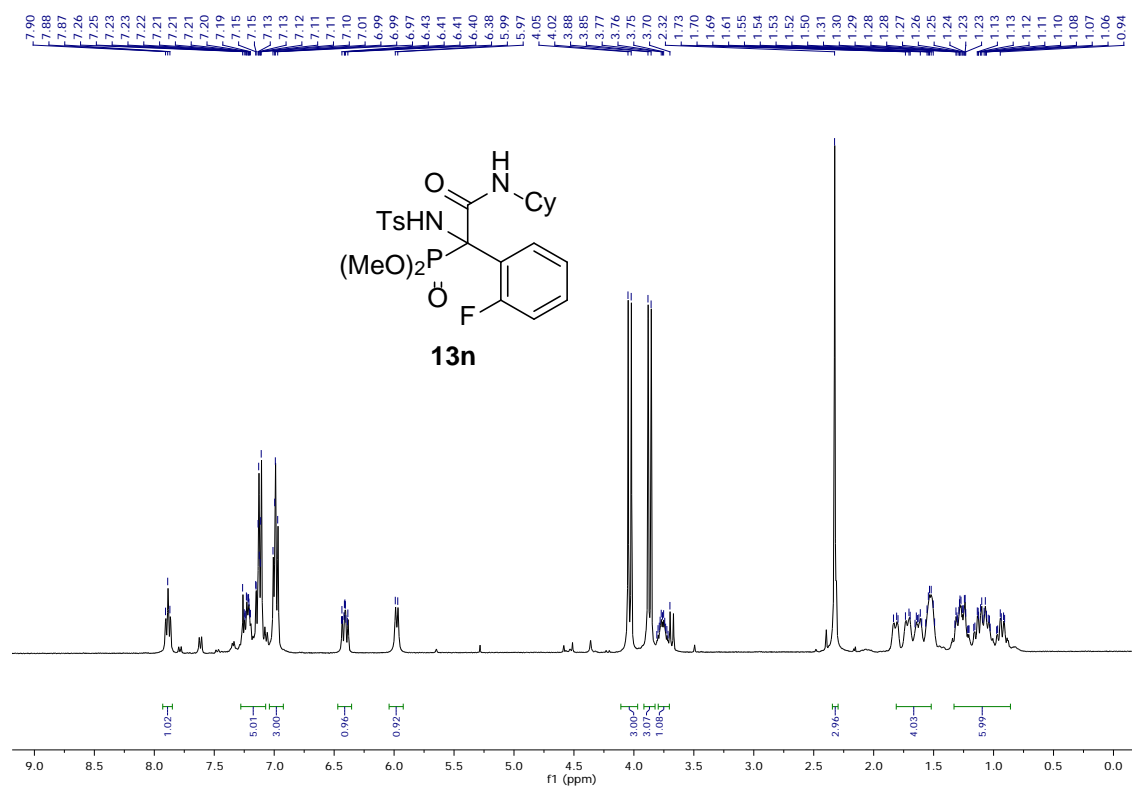

**<sup>13</sup>C NMR {<sup>1</sup>H} (101 MHz, CDCl<sub>3</sub>)**

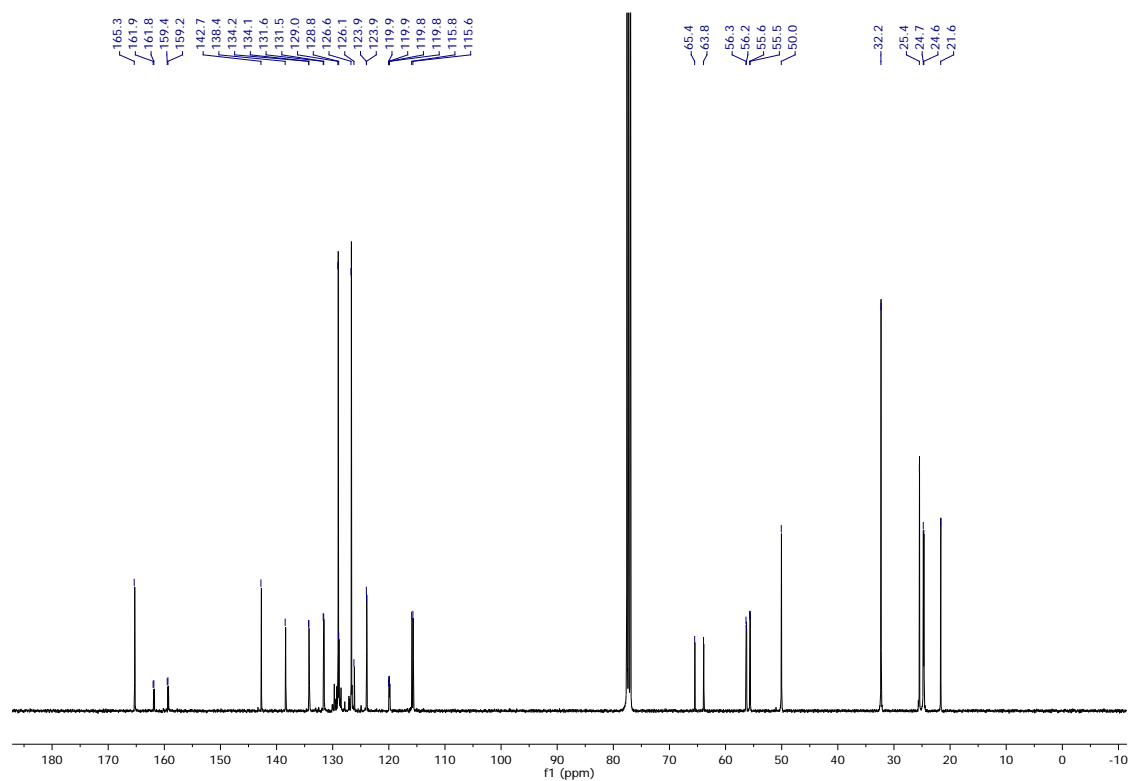

**<sup>31</sup>P NMR (121 MHz, CDCl<sub>3</sub>)**

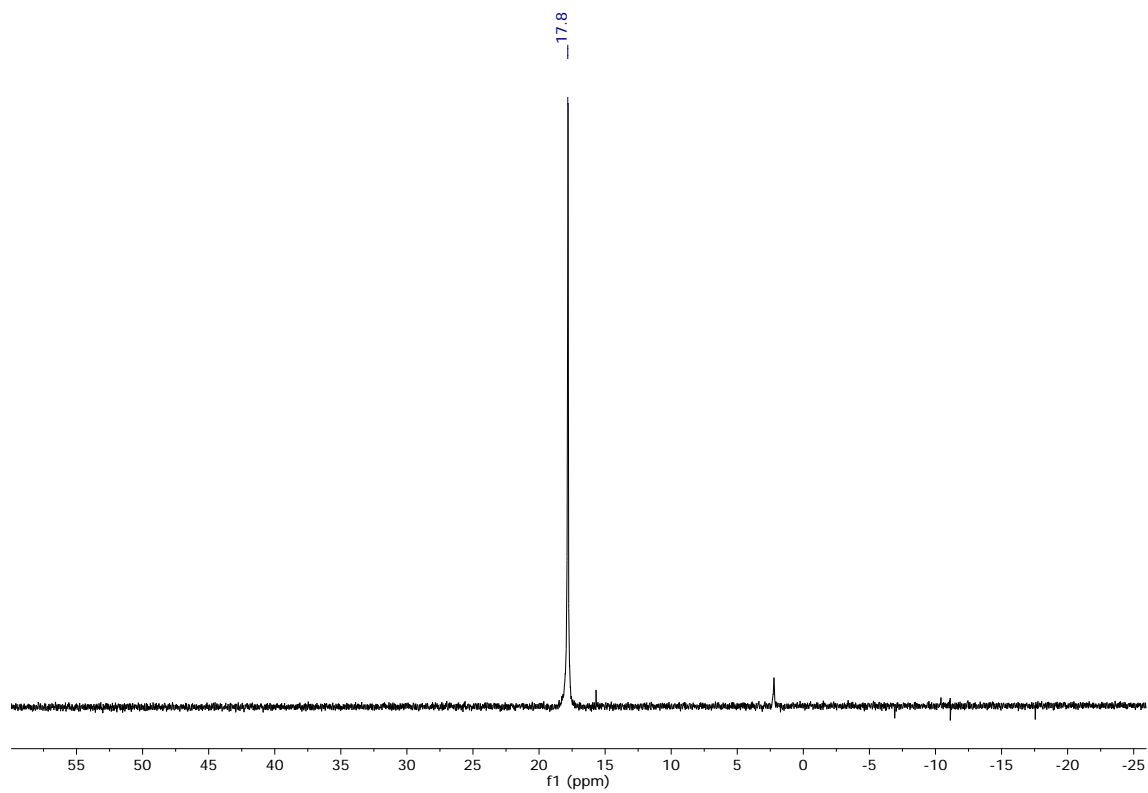

$^{19}\text{F}$  NMR (282 MHz,  $\text{CDCl}_3$ )

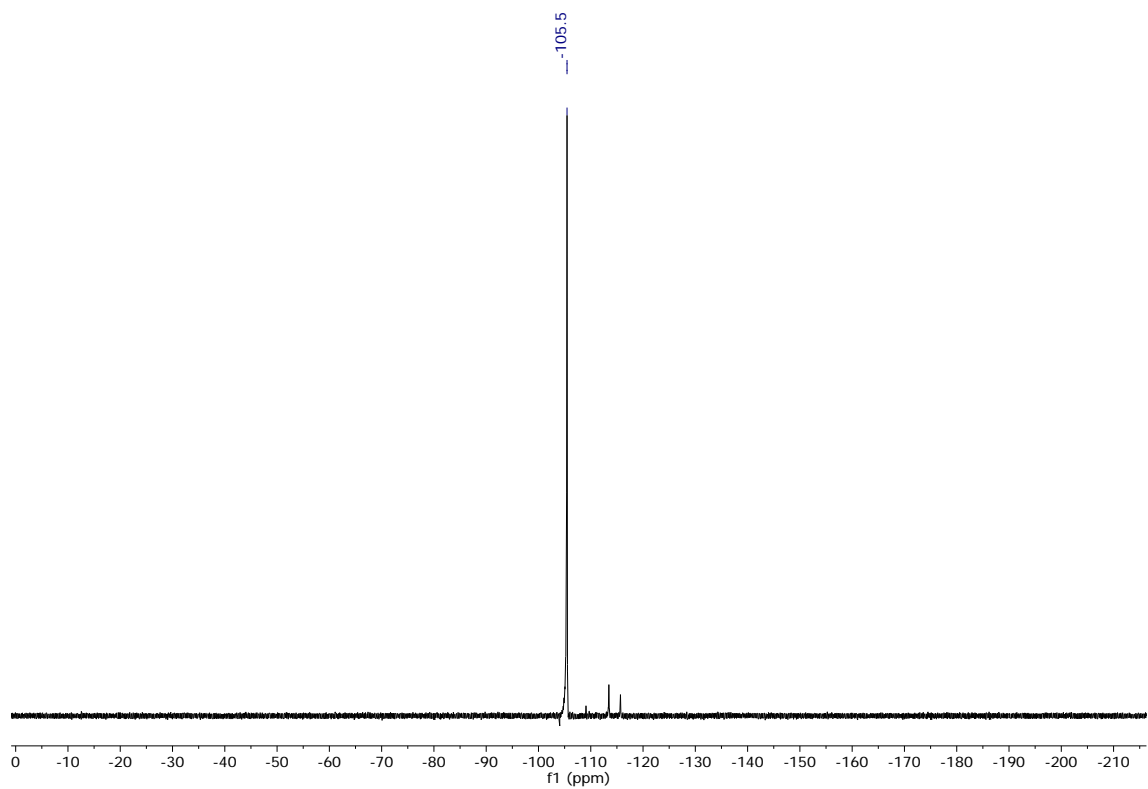

Dimethyl (2-(cyclohexylamino)-1-((4-methylphenyl)sulfonamido)-2-oxo-1-(perfluorophenyl)ethyl)phosphonate (13o)

$^1\text{H}$  NMR (400 MHz,  $\text{CDCl}_3$ )

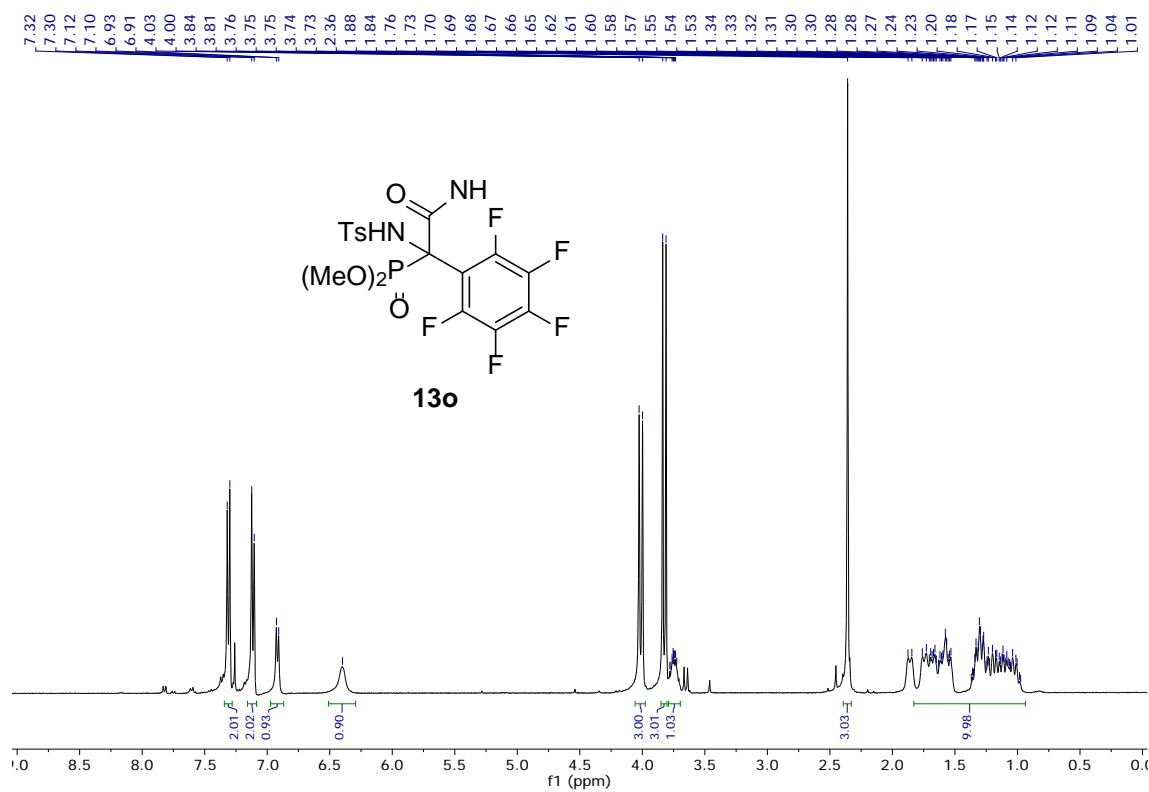

$^{13}\text{C}$  NMR { $^1\text{H}$ } (101 MHz,  $\text{CDCl}_3$ )

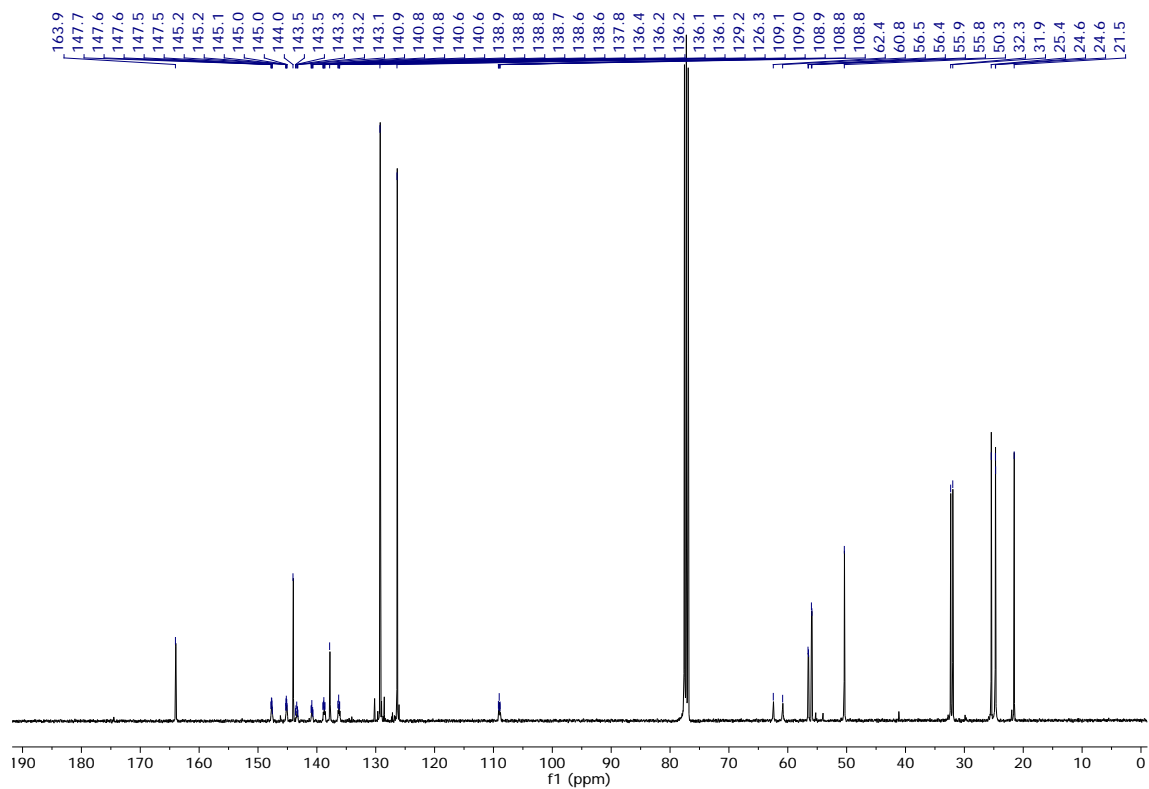

$^{31}\text{P}$  NMR (121 MHz,  $\text{CDCl}_3$ )

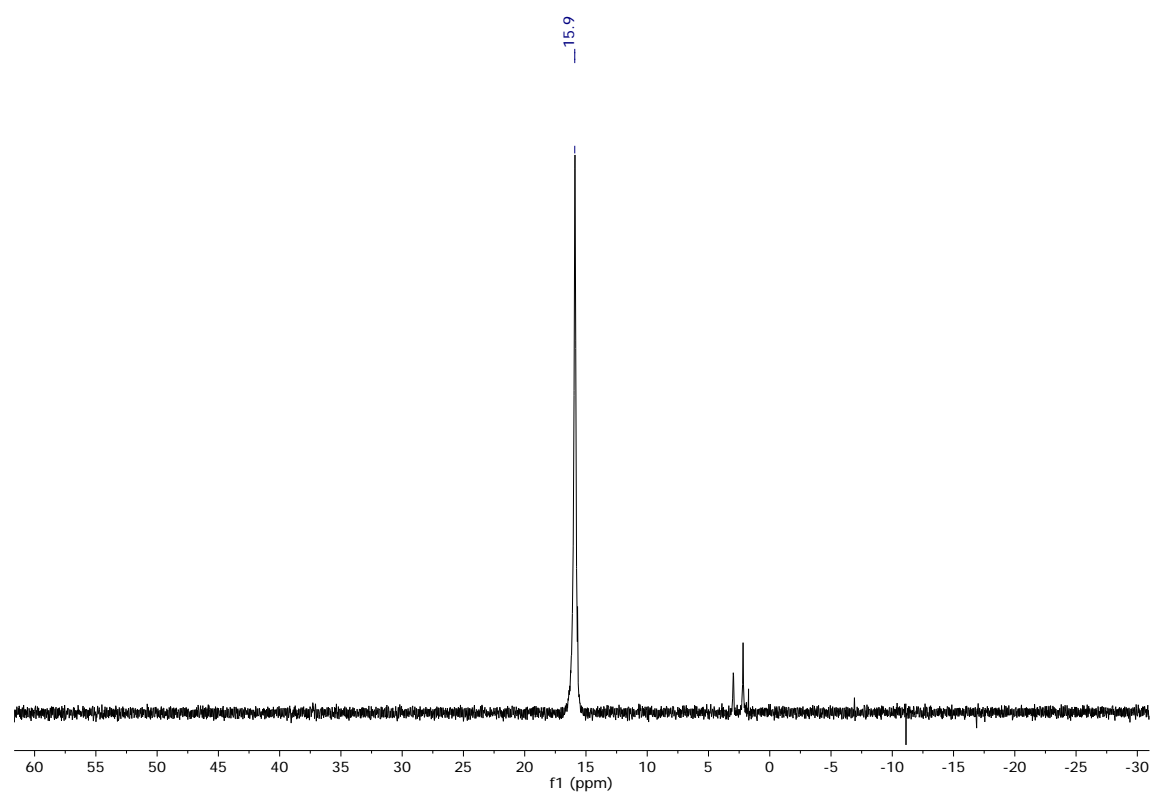

$^{19}\text{F}$  NMR (282 MHz,  $\text{CDCl}_3$ )

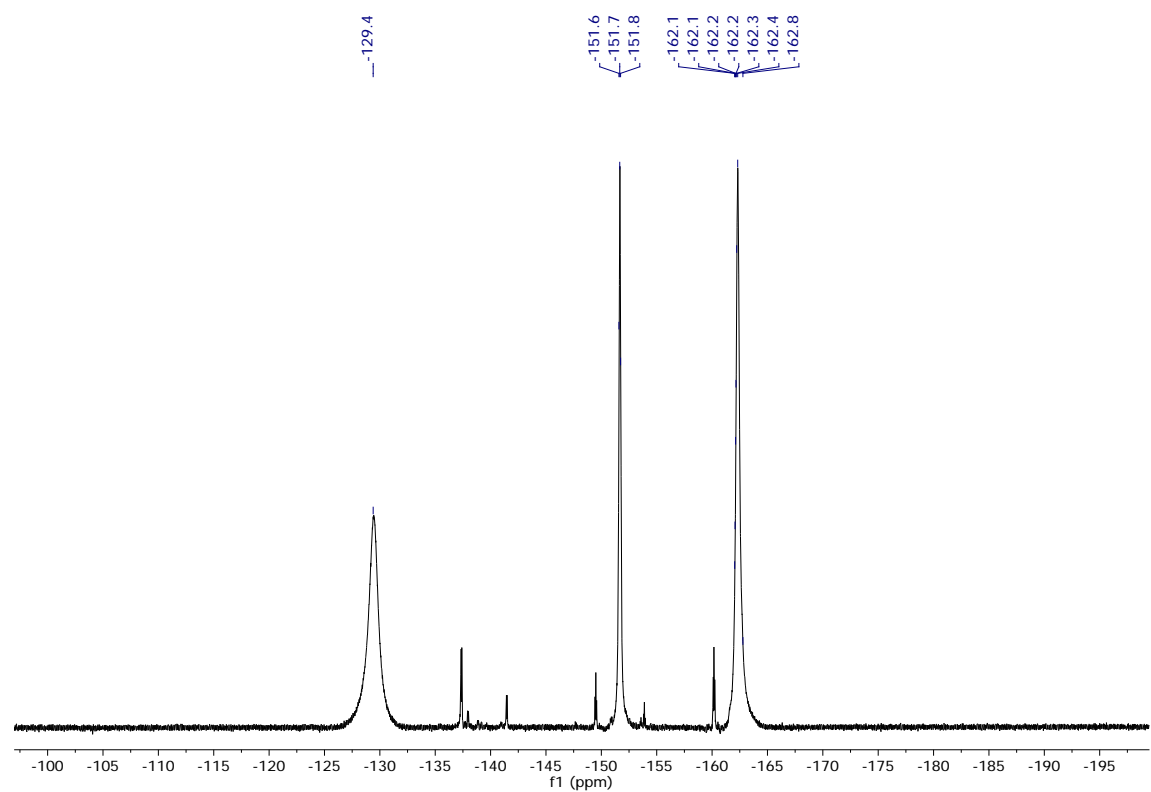

Dimethyl (2-(cyclohexylamino)-1-((4-methylphenyl)sulfonamido)-2-oxo-1-(4-((trichloromethyl)thio)phenyl)ethyl)phosphonate (13p)

$^1\text{H}$  NMR (400 MHz,  $\text{CDCl}_3$ )

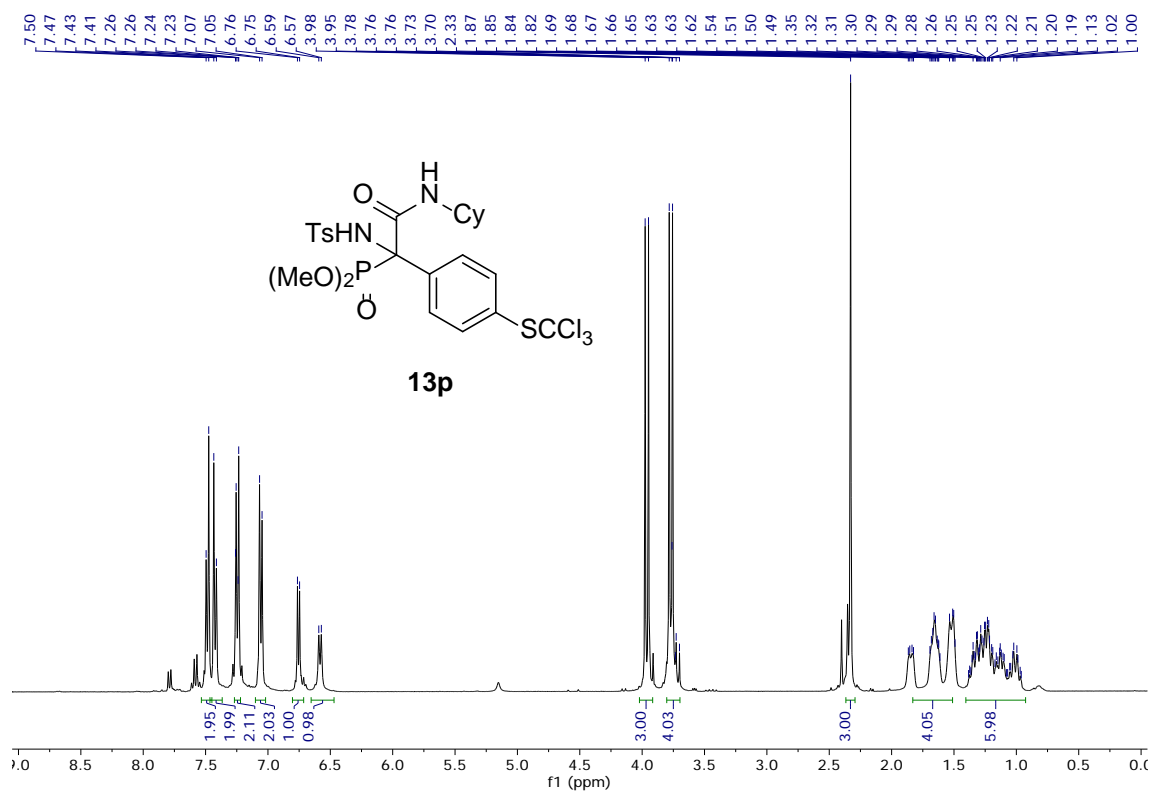

$^{13}\text{C}$  NMR { $^1\text{H}$ } (101 MHz,  $\text{CDCl}_3$ )

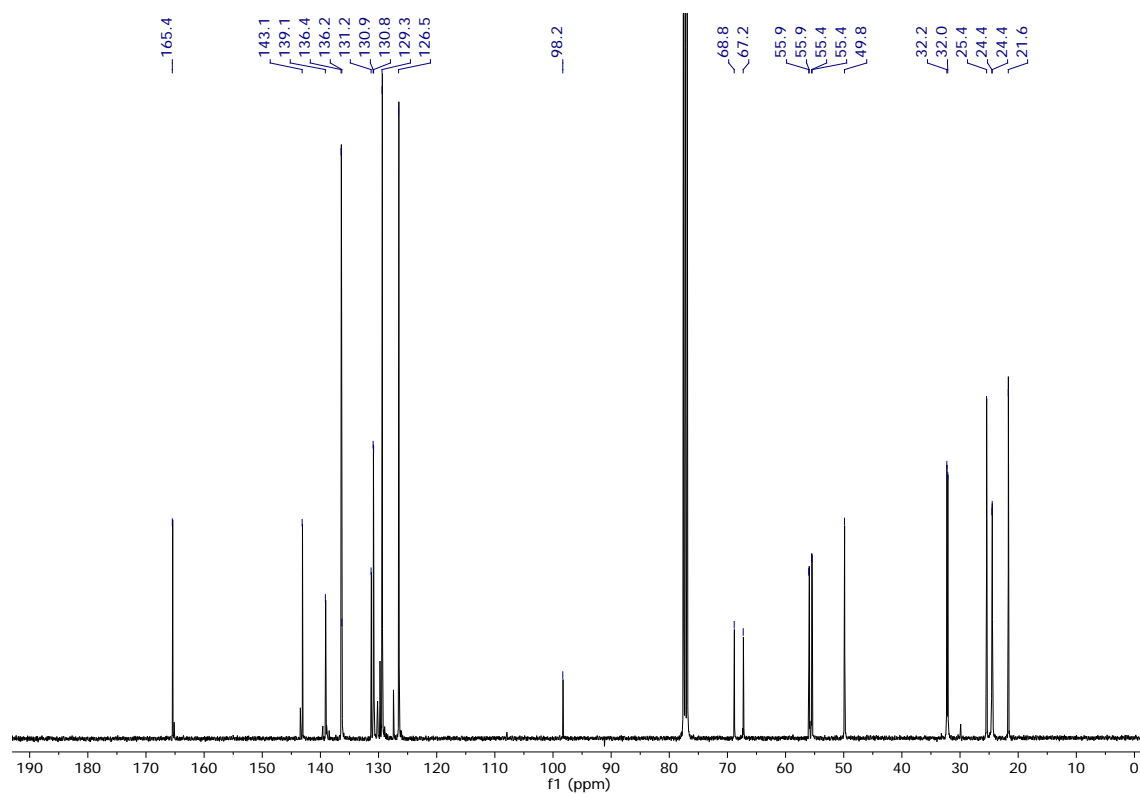



$^{31}\text{P}$  NMR (121 MHz,  $\text{CDCl}_3$ )

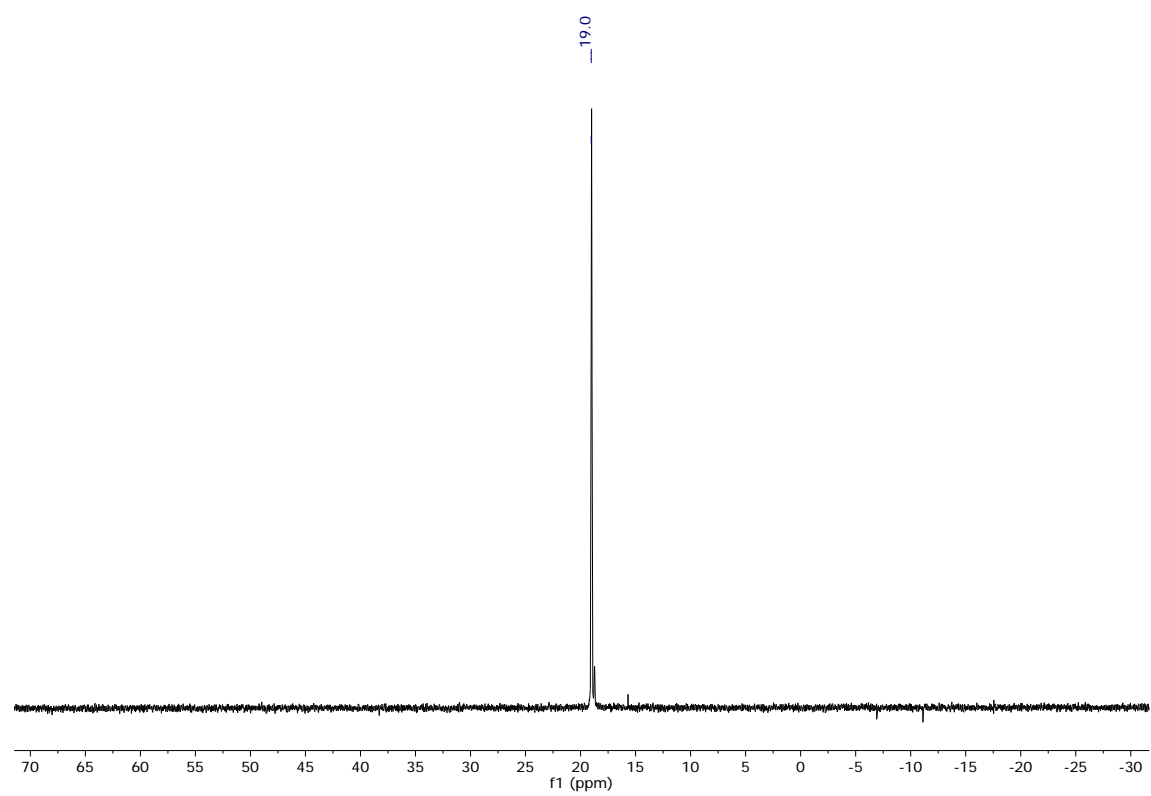

**Dimethyl (1-(3-chloro-4-methoxyphenyl)-2-(cyclohexylamino)-1-((4-methylphenyl)sulfonamido)-2-oxoethyl)phosphonate (13q).**

$^1\text{H}$  NMR (400 MHz,  $\text{CDCl}_3$ )

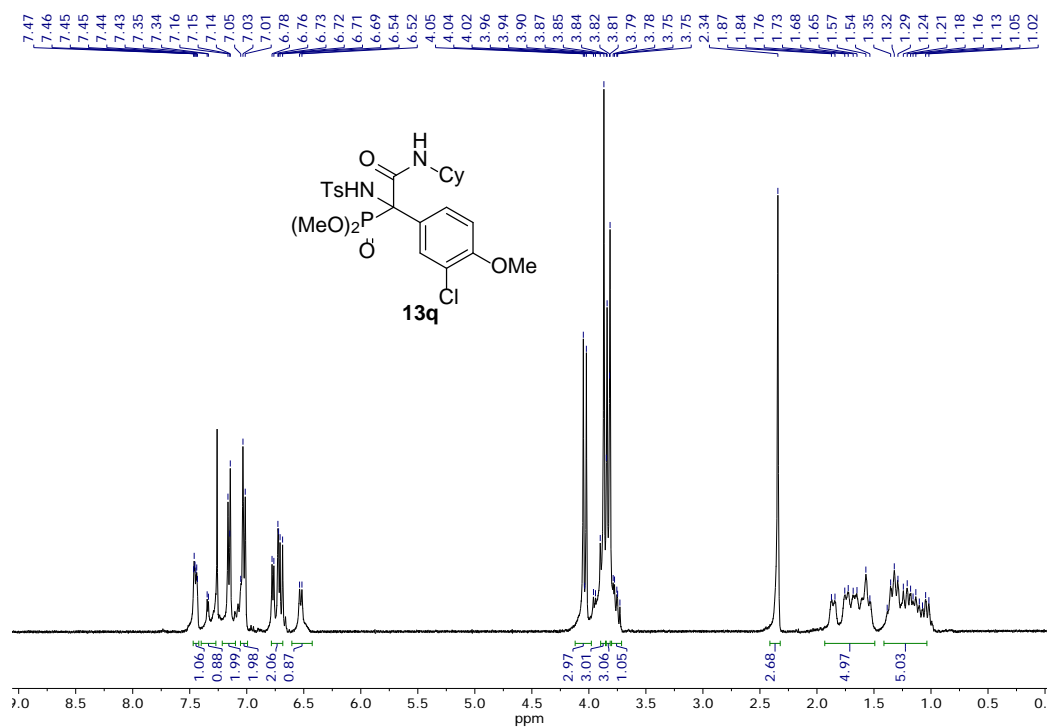

$^{13}\text{C}$  NMR [ $^1\text{H}$ ] (101 MHz,  $\text{CDCl}_3$ )

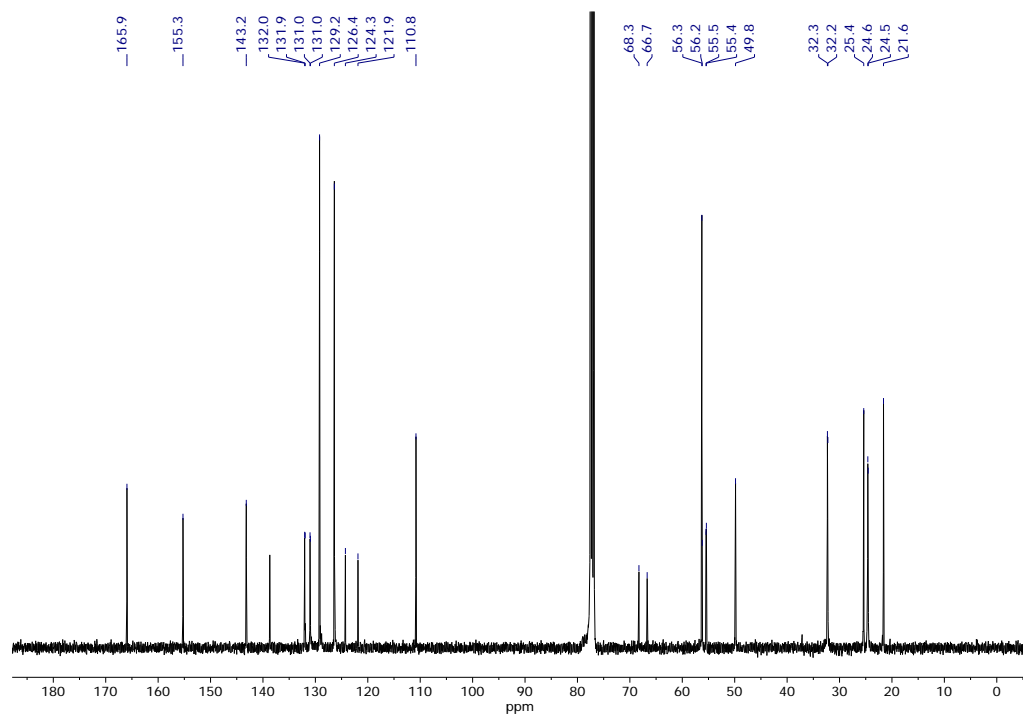

$^{31}\text{P}$  NMR (121 MHz,  $\text{CDCl}_3$ )

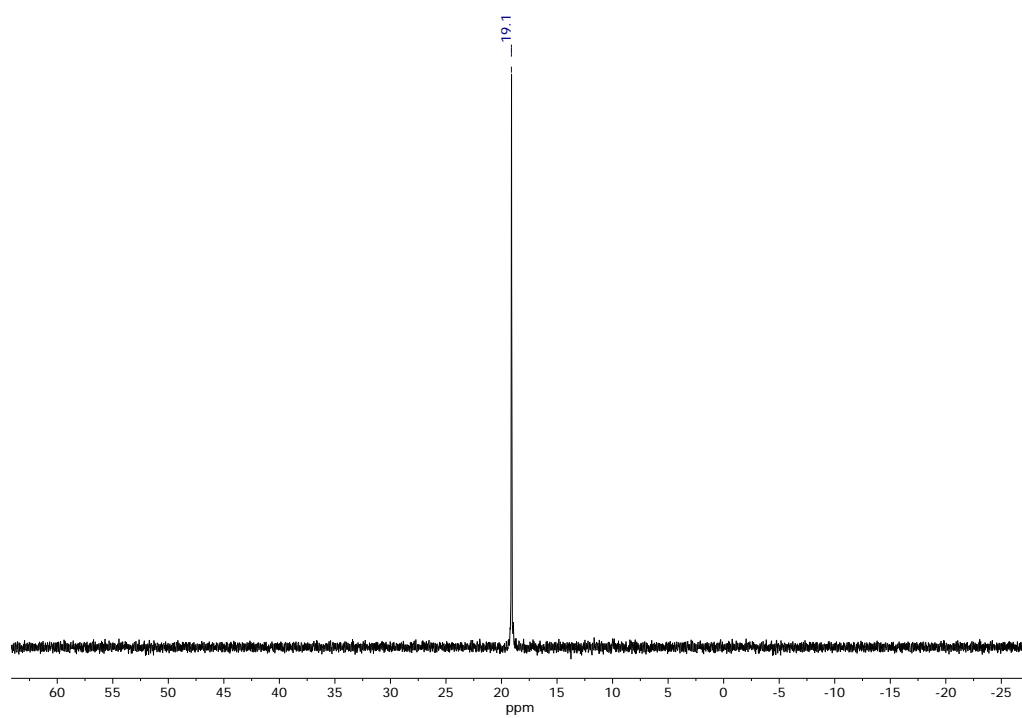

Dimethyl (2-(cyclohexylamino)-1-((4-methylphenyl)sulfonamido)-2-oxo-1-(4-(trifluoromethyl)phenyl)ethyl)phosphonate (13r)

$^1\text{H}$  NMR (400 MHz,  $\text{CDCl}_3$ )

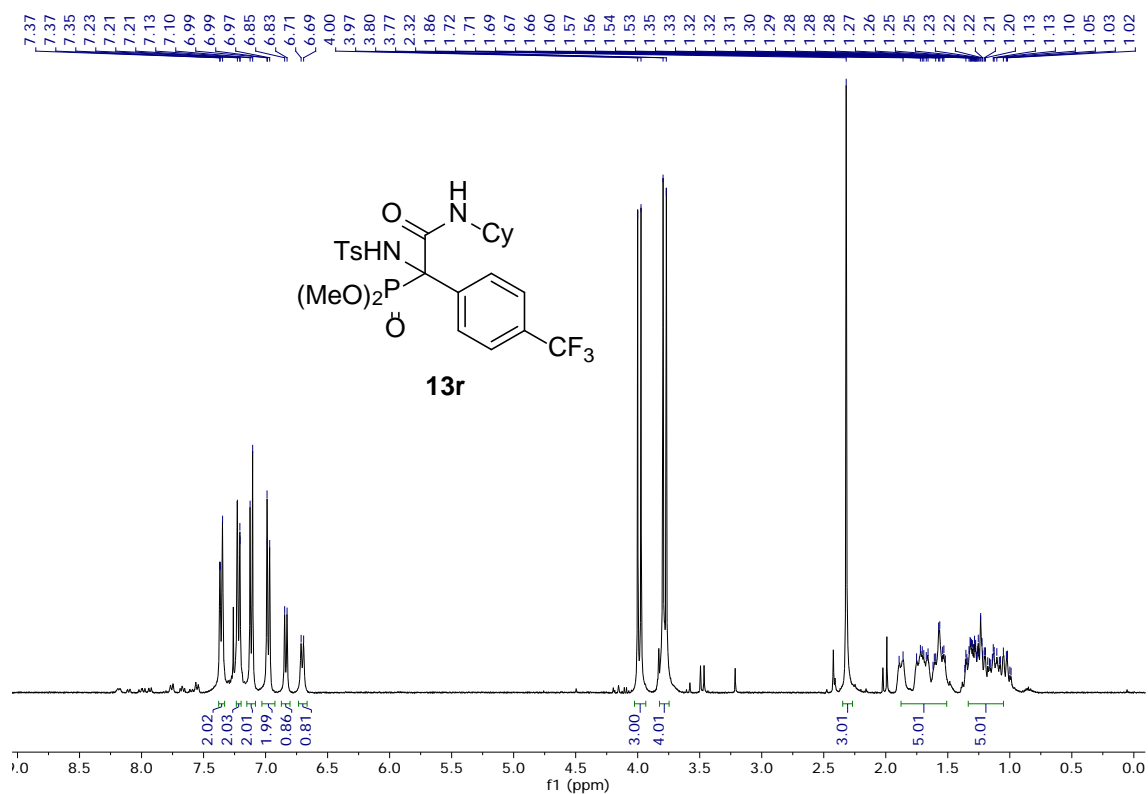

$^{13}\text{C}$  NMR { $^1\text{H}$ } (101 MHz,  $\text{CDCl}_3$ )

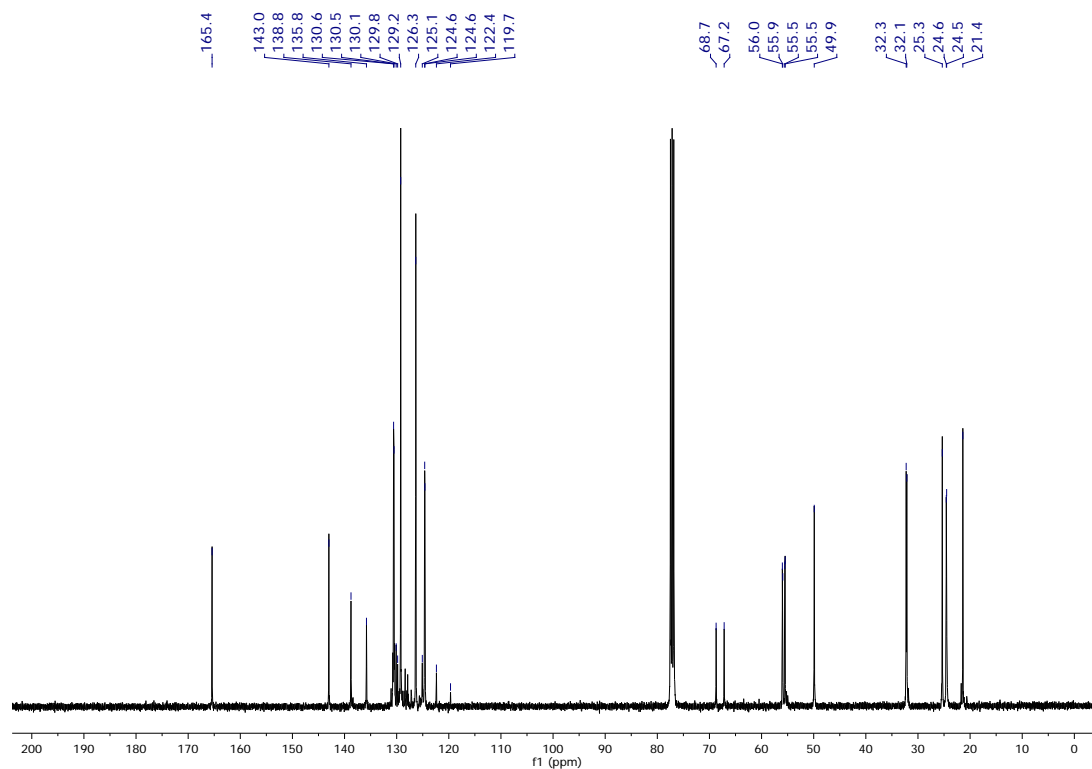

$^{31}\text{P}$  NMR (121 MHz,  $\text{CDCl}_3$ )

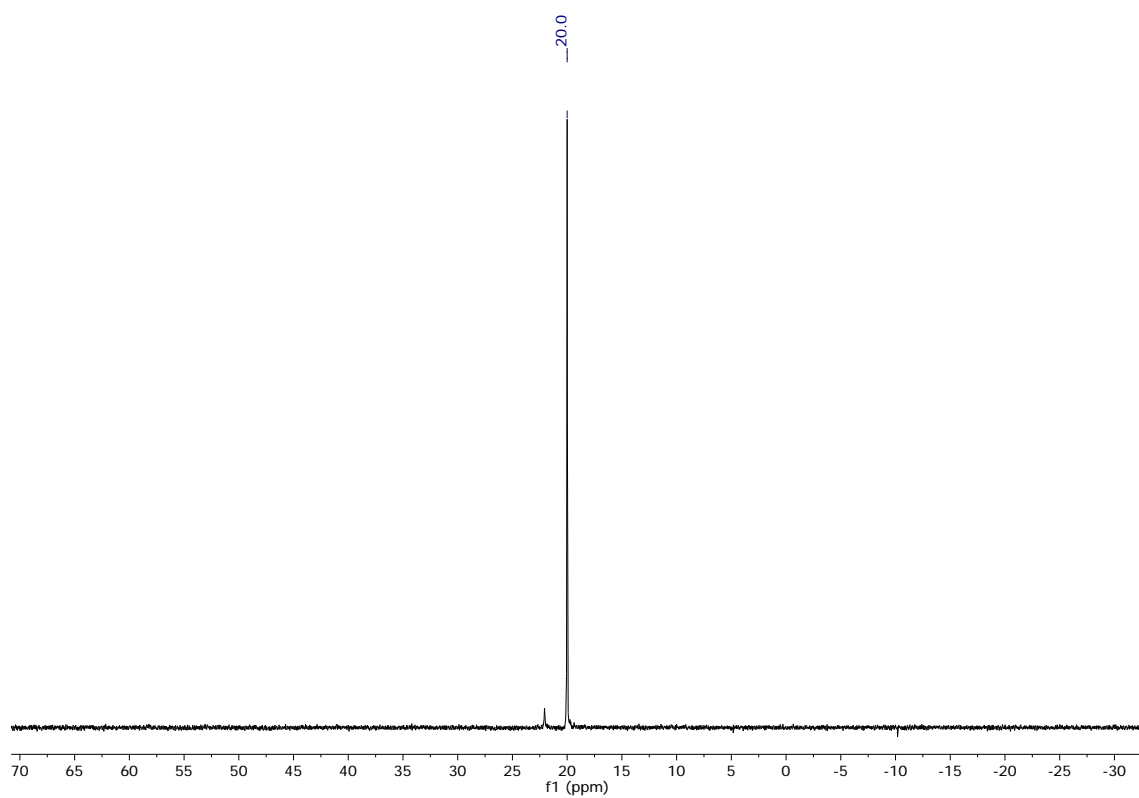

$^{19}\text{F}$  NMR (282 MHz,  $\text{CDCl}_3$ )

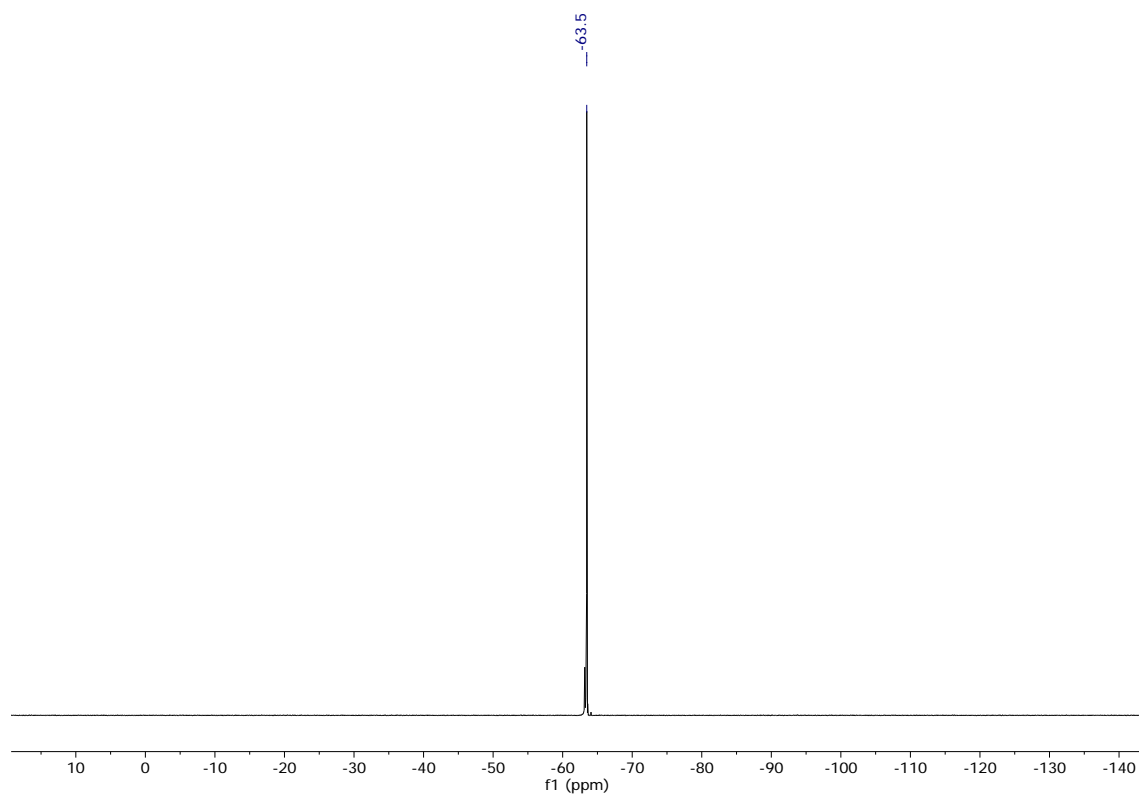

**Dimethyl (2-(cyclohexylamino)-2-oxo-1-(2-phenylacetamido)ethyl)phosphonate (16).**

$^1\text{H}$  NMR (300 MHz,  $\text{CDCl}_3$ )

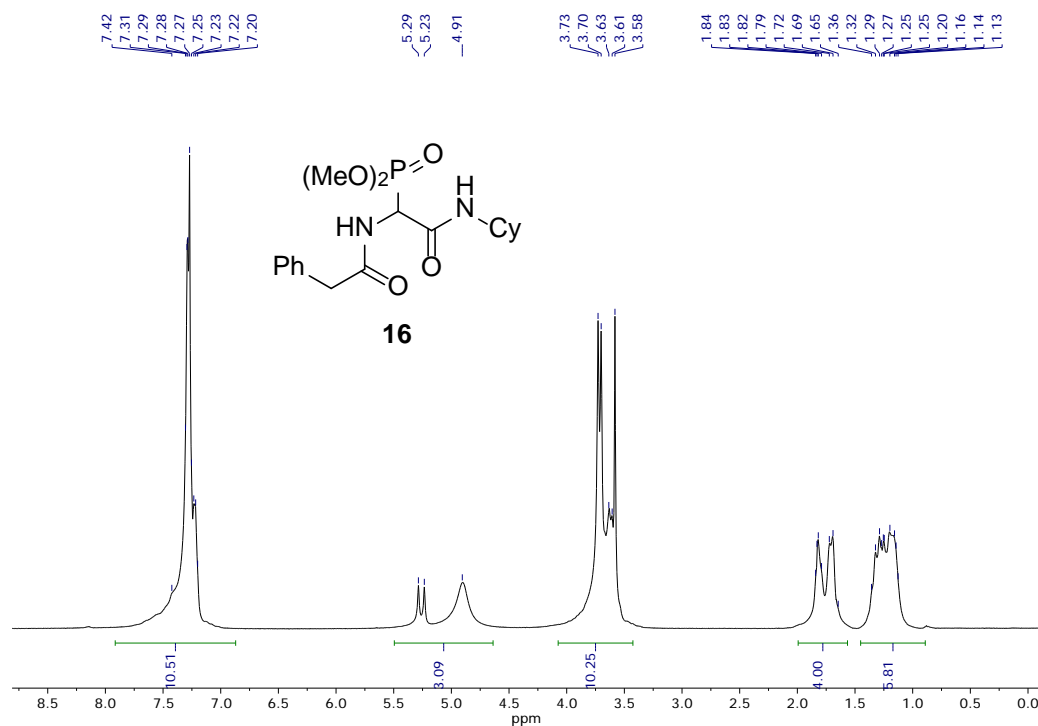

$^{13}\text{C}$  NMR  $\{^1\text{H}\}$  (101 MHz,  $\text{CD}_3\text{OD}$ )

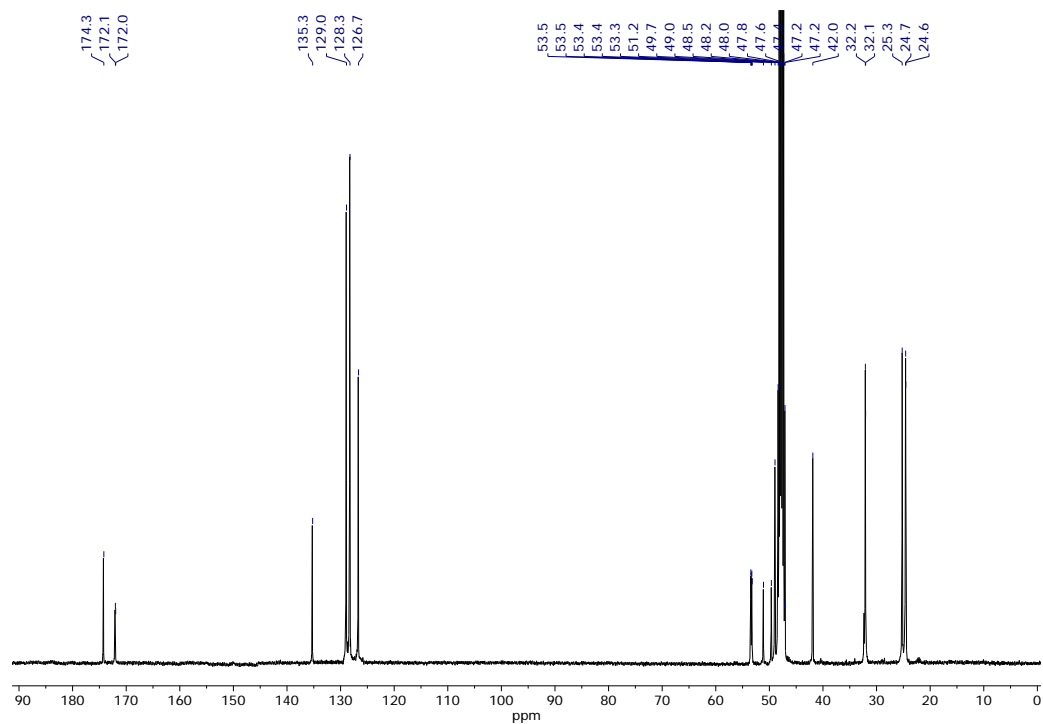

$^{31}\text{P}$  NMR (121 MHz,  $\text{CDCl}_3$ )

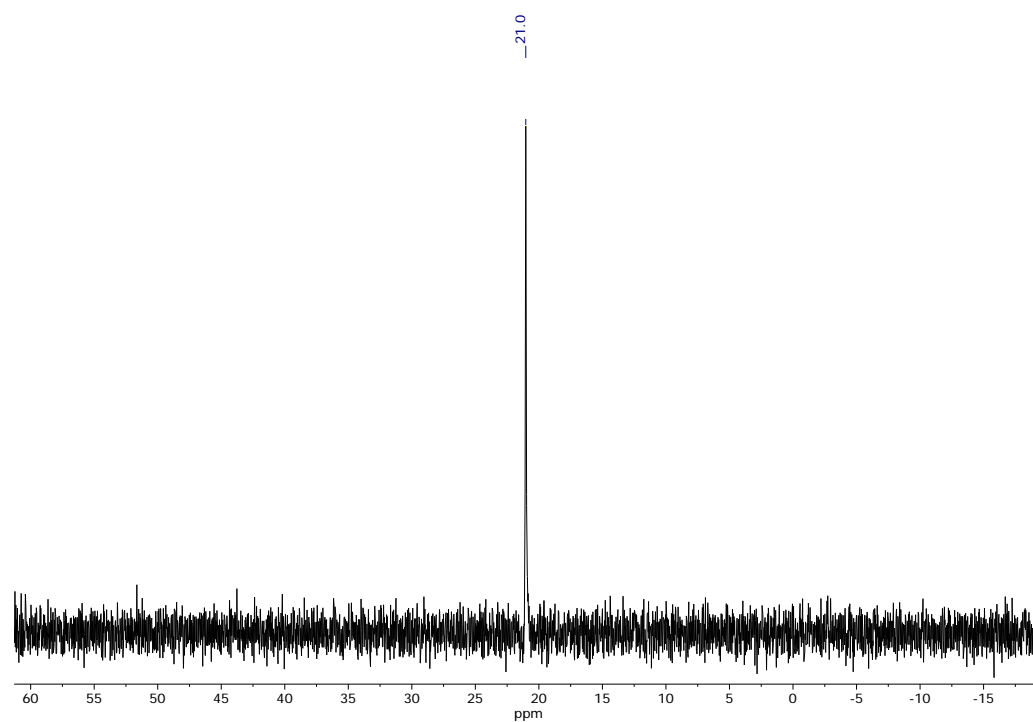

<sup>1</sup>H NMR (400 MHz, CDCl<sub>3</sub>)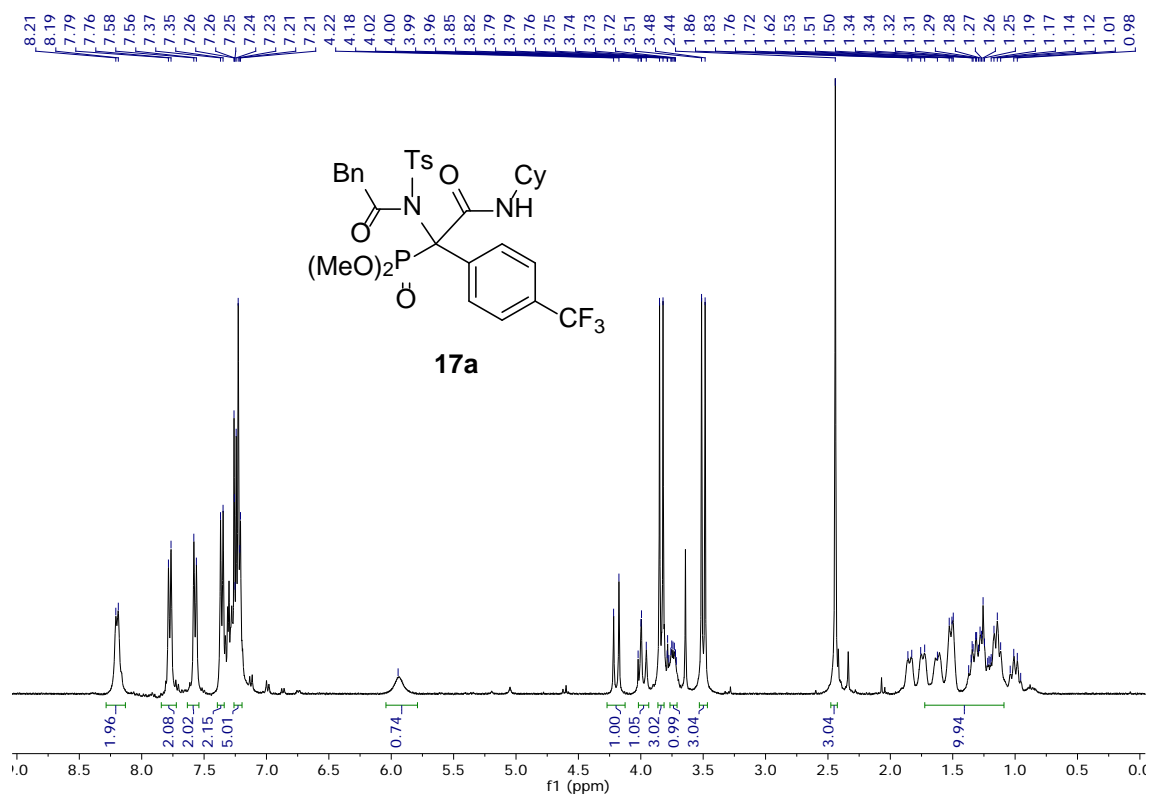 $^{13}\text{C}$  NMR { $^1\text{H}$ } (101 MHz,  $\text{CDCl}_3$ )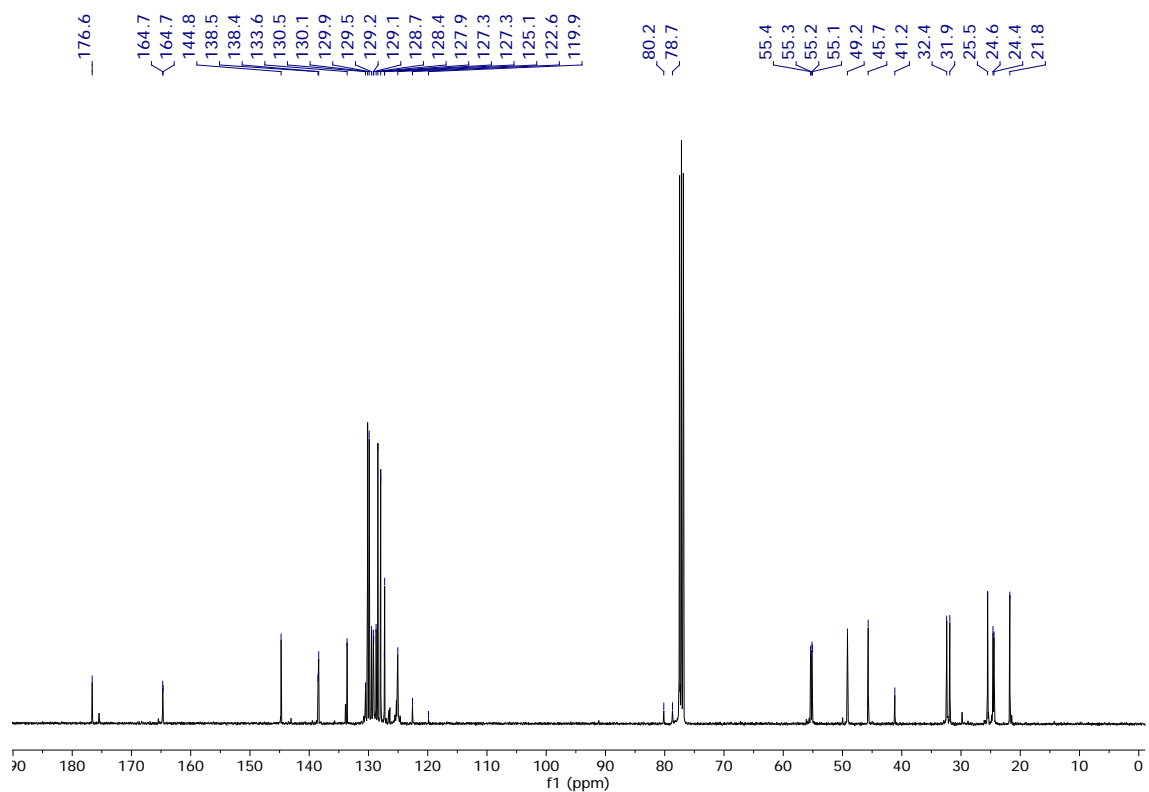



$^{31}\text{P}$  NMR (121 MHz,  $\text{CDCl}_3$ )

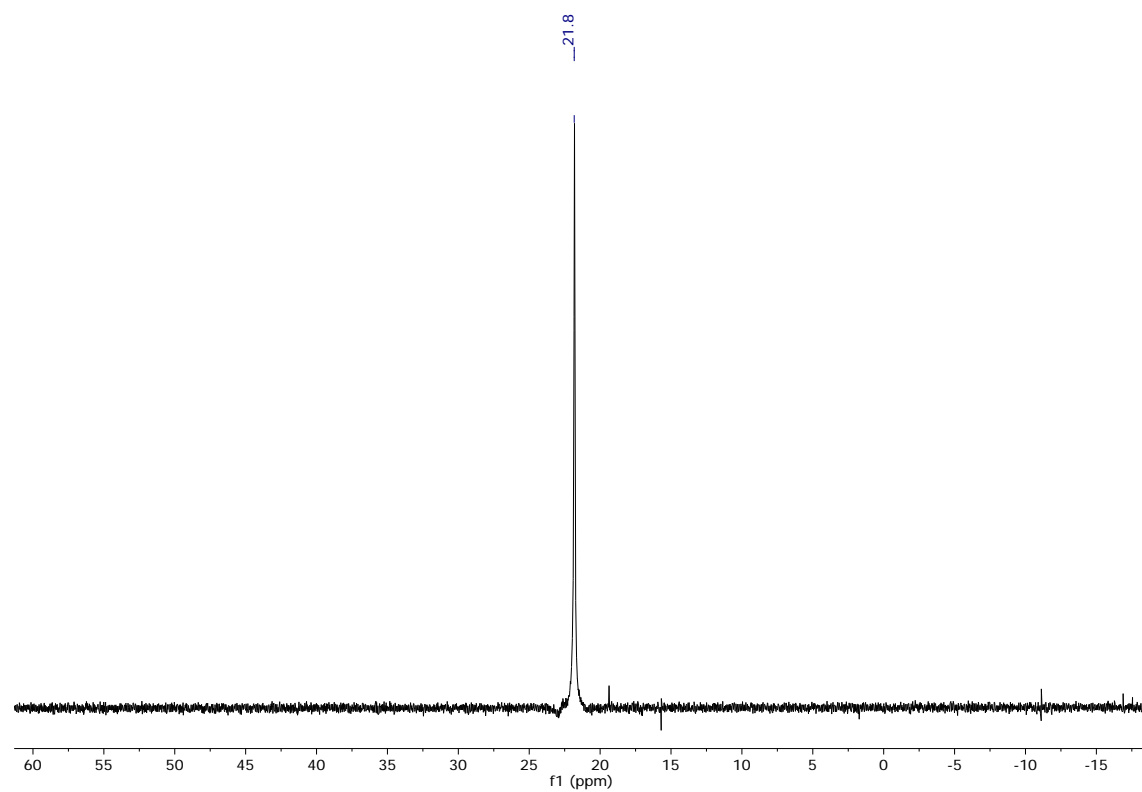

$^{19}\text{F}$  NMR (282 MHz,  $\text{CDCl}_3$ )

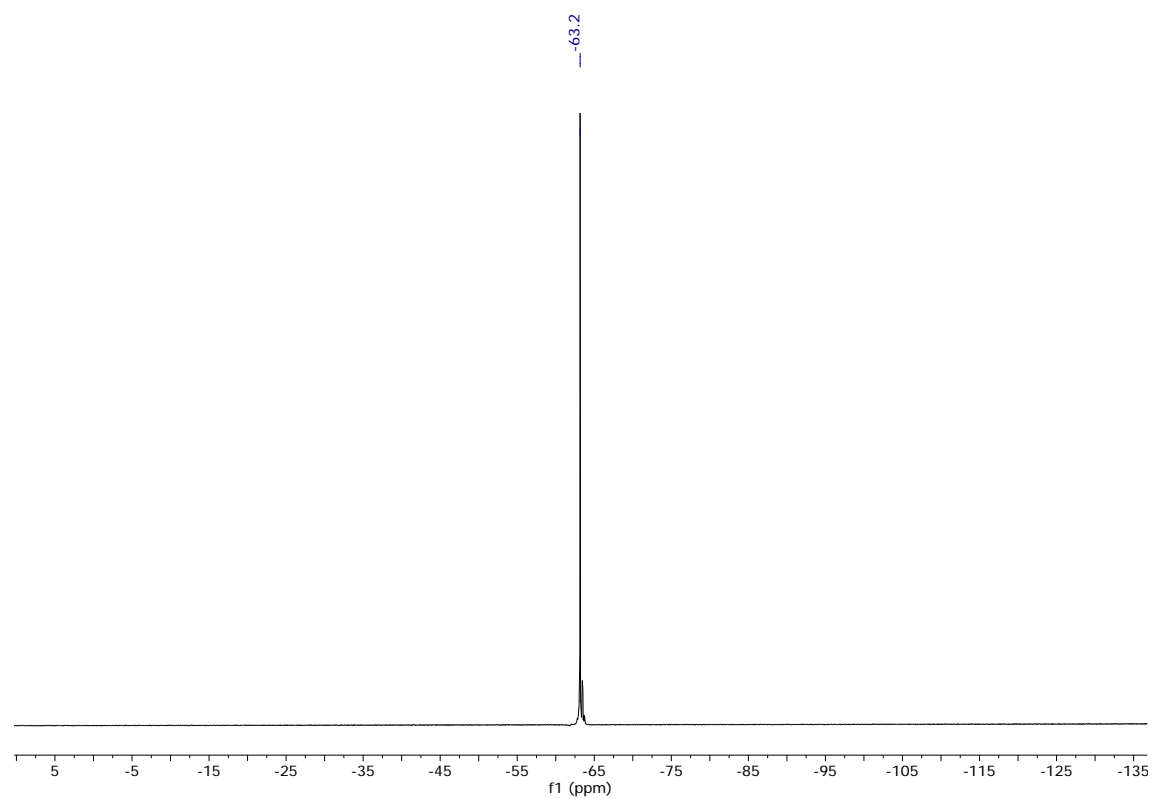

**Dimethyl (2-(cyclohexylamino)-1-(4-fluorophenyl)-1-((4-methylphenyl)sulfonamido)-2-oxoethyl)phosphonate (17b).**

$^1\text{H}$  NMR (400 MHz,  $\text{CDCl}_3$ )

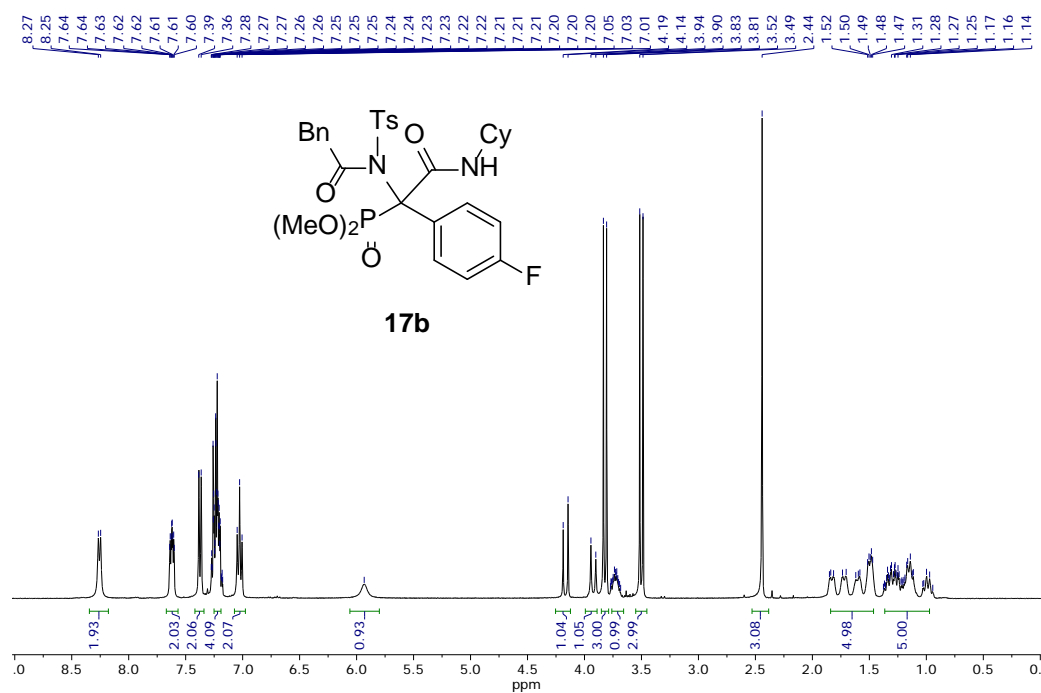

$^{13}\text{C}$   $\{^1\text{H}\}$  NMR (101 MHz,  $\text{CDCl}_3$ )

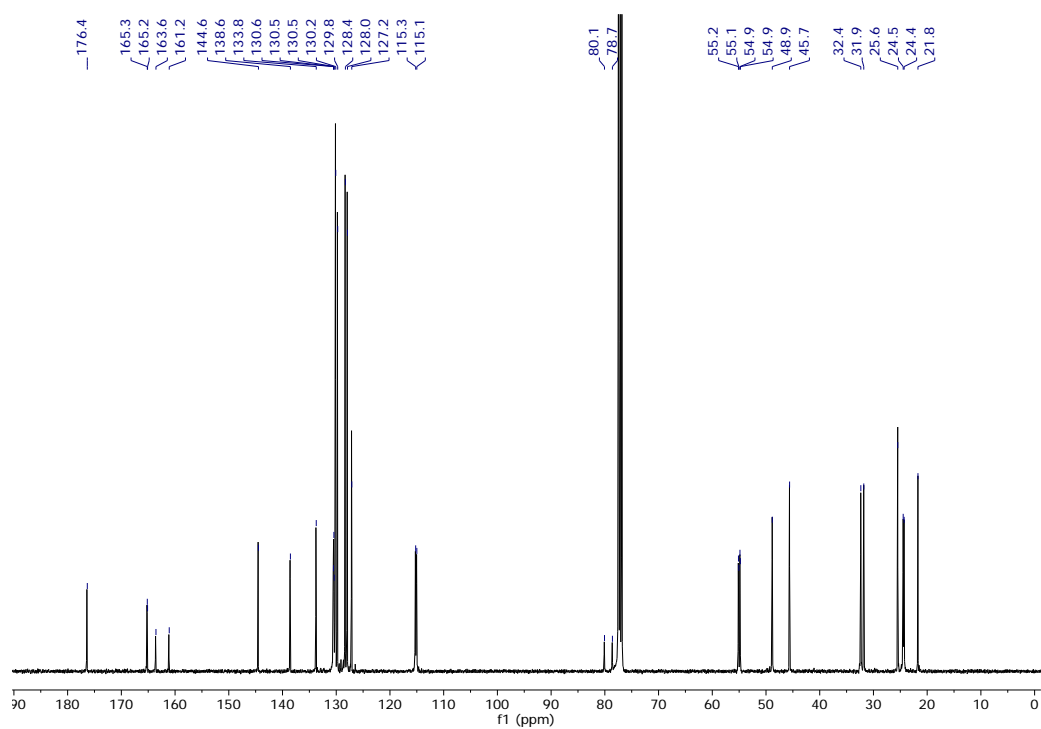

$^{31}\text{P}$  NMR (121 MHz,  $\text{CDCl}_3$ )

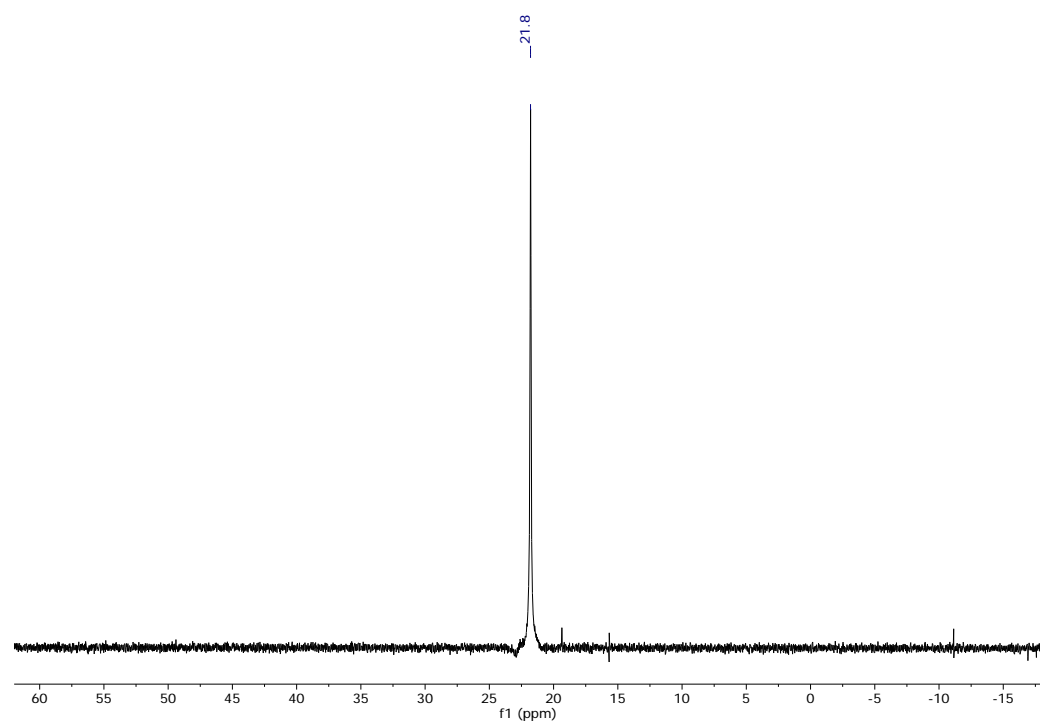

$^{19}\text{F}$  NMR (282 MHz,  $\text{CDCl}_3$ )

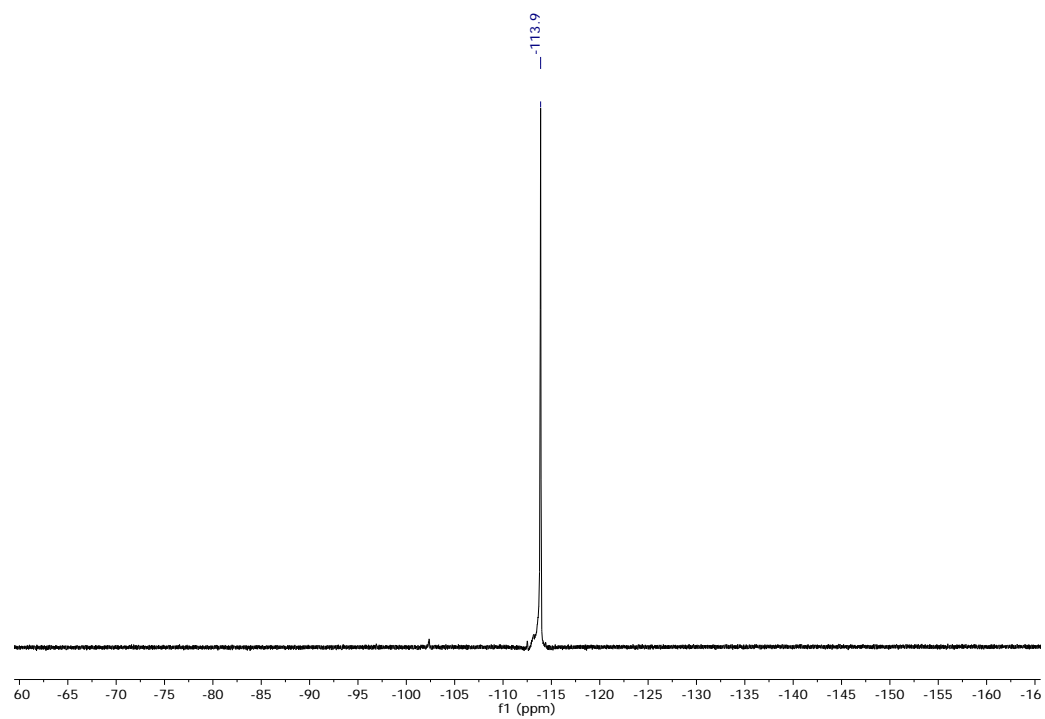

**(2-((2-Methoxy-2-oxoethyl)amino)-1-((4-methylphenyl)sulfonamido)-2-oxo-1-phenylethyl)phosphonic acid (24)..**

**<sup>1</sup>H NMR (400 MHz, D<sub>2</sub>O)**

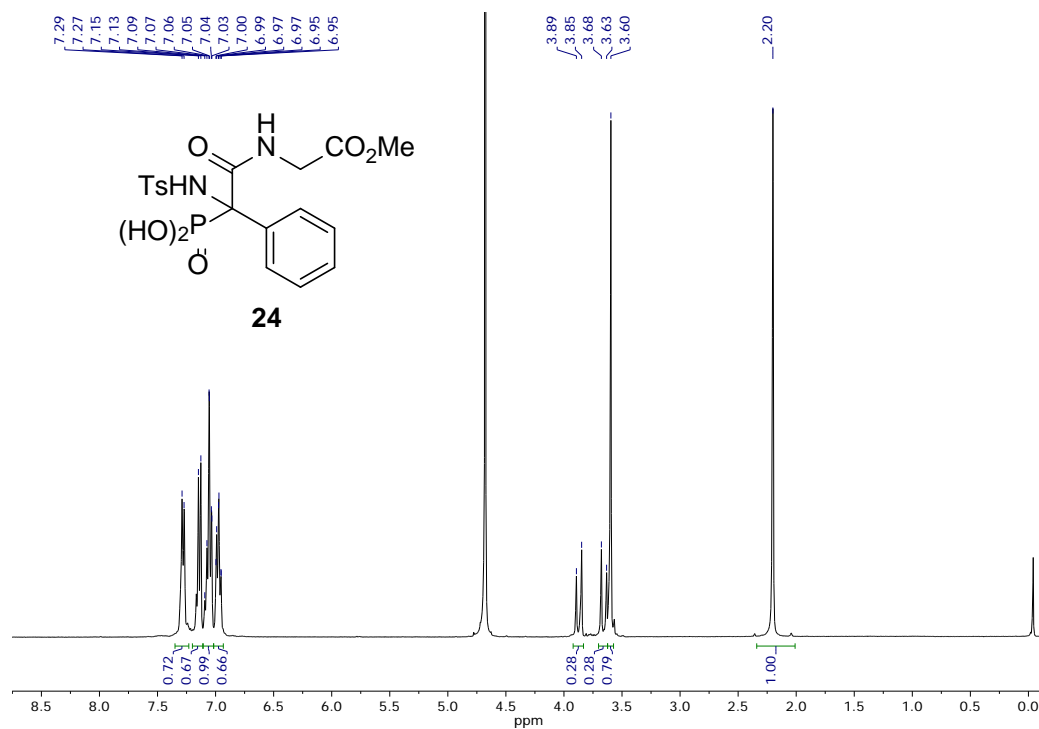

**<sup>13</sup>C NMR {<sup>1</sup>H} (101 MHz, D<sub>2</sub>O)**

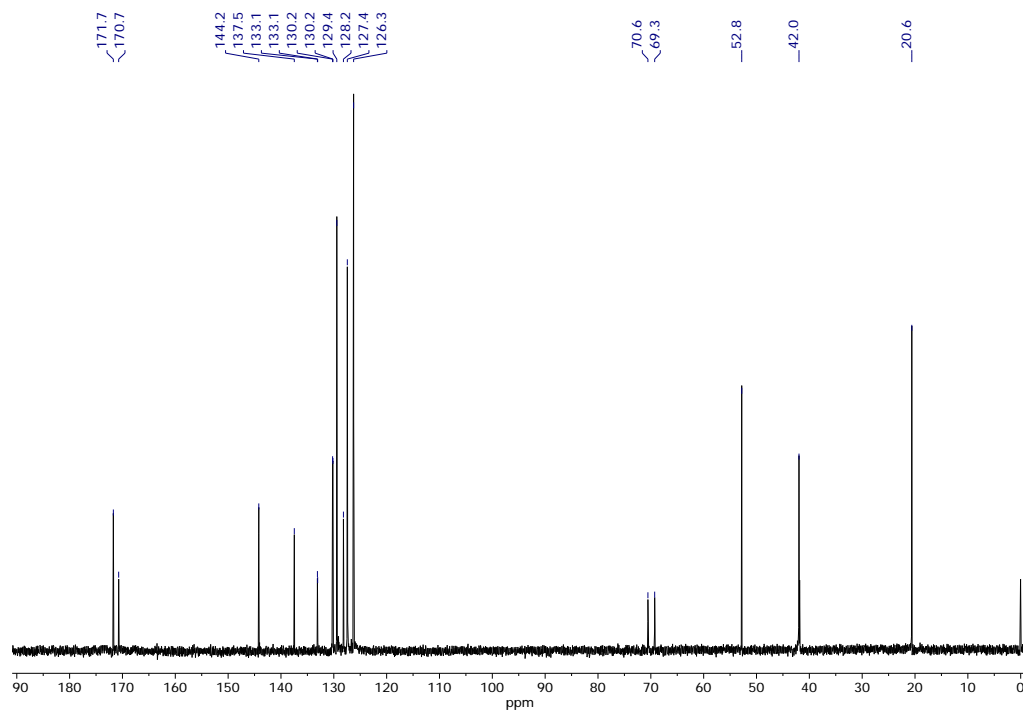

$^{31}\text{P}$  NMR (121 MHz,  $\text{D}_2\text{O}$ )

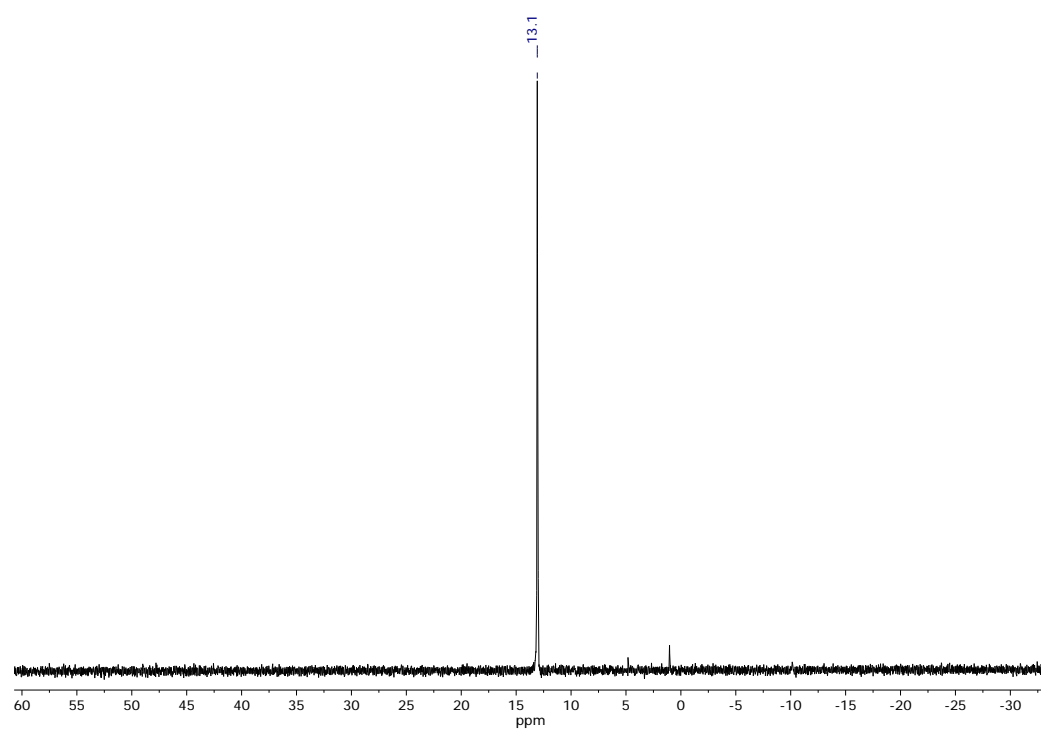

Supplement: s1 [file s1]
